# Supplementary material
Source: PubMed Central journal article supplement (PMC4566230)
Supplement: supp_M115.664565_jbc.M115.664565-1.pdf [file supp_M115.664565_jbc.M115.664565-1.pdf]

SUPPLEMENTAL FIGURE 1. Steap family amino acid sequence alignment. All complete Steap family amino acid sequences were collected from the NCBI nr database and aligned with Clustal Omega software. Sequences under the same panel number are aligned with each other. The strictly-conserved residues in the oxidoreductase domain of Steap2, 3, and 4 are indicated by blue boxes (panels 3.B-F, 4.B-F, 5.B-F). Strictly-conserved residues in the transmembrane domain of Steap1, 2, 3, and 4 are indicated by red boxes (panels 6.A-F, 7.A-F, 8.A-F). Conserved residue numbers are given at the bottom of each panel according to human Steap3 numbering. Species name and identification of Steap member subtype can be found by sequence accession number in the supplemental spreadsheet.

gi|19558759|ref|NP\_036581.1|  
 gi|114614402|ref|XP\_001164872.1|  
 gi|109067567|ref|XP\_001103605.1|  
 gi|297681115|ref|XP\_002818311.1|  
 gi|635114985|ref|XP\_007980441.1|  
 gi|281183115|ref|NP\_001162459.1|  
 gi|332206685|ref|XP\_003252427.1|  
 gi|675704305|ref|XP\_008960306.1|  
 gi|355747866|gb|EHH52363.1|  
 gi|403257228|ref|XP\_003921231.1|  
 gi|167427288|gb|ABZ80265.1|  
 gi|296209751|ref|XP\_002751667.1|  
 gi|168986657|gb|ACA35052.1|  
 gi|545522297|ref|XP\_005628542.1|  
 gi|562883058|ref|XP\_006169062.1|  
 gi|640797078|ref|XP\_008054657.1|  
 gi|284005327|ref|NP\_001164745.1|  
 gi|47523676|ref|NP\_999470.1|  
 gi|465984745|ref|XP\_004265676.1|  
 gi|602733452|ref|XP\_007452111.1|  
 gi|532098195|ref|XP\_005334745.1|  
 gi|488586809|ref|XP\_004478735.1|  
 gi|472348935|ref|XP\_004394171.1|  
 gi|593759248|ref|XP\_007118379.1|  
 gi|585167015|ref|XP\_006735605.1|  
 gi|471395595|ref|XP\_004381562.1|  
 gi|548463586|ref|XP\_005679360.1|  
 gi|470652036|ref|XP\_004329145.1|  
 gi|426227822|ref|XP\_004008014.1|  
 gi|594104641|ref|XP\_006075297.1|  
 gi|634845395|ref|XP\_007938026.1|  
 gi|591299555|ref|XP\_007076794.1|  
 gi|667308743|ref|XP\_008583828.1|  
 gi|344270750|ref|XP\_003407206.1|  
 gi|410952218|ref|XP\_003982780.1|  
 gi|560979325|ref|XP\_006211919.1|  
 gi|560936071|ref|XP\_006193855.1|  
 gi|533147257|ref|XP\_005388040.1|  
 gi|177773086|gb|ACB73280.1|  
 gi|556762767|ref|XP\_005976676.1|  
 gi|594697428|ref|XP\_007195873.1|  
 gi|194209596|ref|XP\_001492607.2|  
 gi|329663204|ref|NP\_001192735.1|  
 gi|670986759|ref|XP\_008684436.1|  
 gi|507646395|ref|XP\_004702858.1|  
 gi|586554622|ref|XP\_006925768.1|  
 gi|507930961|ref|XP\_004676724.1|  
 gi|478514256|ref|XP\_004431379.1|  
 gi|395818574|ref|XP\_003782699.1|  
 gi|558107925|ref|XP\_006084992.1|  
 gi|281350064|gb|EFB25648.1|  
 gi|641692779|ref|XP\_008147526.1|  
 gi|514471127|ref|XP\_003475031.2|  
 gi|554563711|ref|XP\_005876179.1|  
 gi|512867117|ref|XP\_004891357.1|  
 gi|586451062|ref|XP\_006878402.1|  
 gi|584041388|ref|XP\_006779245.1|  
 gi|301769711|ref|XP\_002920273.1|  
 gi|674094851|ref|XP\_008820733.1|  
 gi|354484535|ref|XP\_003504442.1|  
 gi|589949124|ref|XP\_006987220.1|  
 gi|507575190|ref|XP\_004671140.1|  
 gi|254553462|ref|NP\_081675.2|  
 gi|157817514|ref|NP\_001100099.1|  
 gi|511830092|ref|XP\_004739744.1|  
 gi|524968285|ref|XP\_005084028.1|  
 gi|504139794|ref|XP\_004582345.1|  
 gi|532030830|ref|XP\_005358357.1|  
 gi|617633976|ref|XP\_007530280.1|  
 gi|585679781|ref|XP\_006891553.1|  
 gi|505775878|ref|XP\_004602338.1|  
 gi|395540028|ref|XP\_003771964.1|  
 gi|126341322|ref|XP\_001368631.1|  
 gi|591381645|ref|XP\_007065358.1|  
 gi|558122566|ref|XP\_006114505.1|  
 gi|465965470|gb|EMP30673.1|  
 gi|530577003|ref|XP\_005282462.1|  
 gi|564230520|ref|XP\_006259687.1|  
 gi|557325124|ref|XP\_006035579.1|  
 gi|695138615|ref|XP\_009510760.1|  
 gi|514739109|ref|XP\_005017951.1|  
 gi|543346262|ref|XP\_005518840.1|  
 gi|675407222|ref|XP\_008932023.1|  
 gi|677239856|gb|KFP55094.1|  
 gi|686595794|ref|XP\_009273958.1|  
 gi|690459531|ref|XP\_009328807.1|  
 gi|326921728|ref|XP\_003207108.1|  
 gi|118085789|ref|XP\_418642.2|  
 gi|527270061|ref|XP\_005153000.1|  
 gi|524985846|ref|XP\_005040881.1|  
 gi|694847615|ref|XP\_009464897.1|  
 gi|676264854|gb|KFO21189.1|  
 gi|679187928|gb|KFW78811.1|  
 gi|677444859|gb|KFK39506.1|  
 gi|675607450|ref|XP\_008947618.1|  
 gi|663262001|ref|XP\_008492350.1|  
 gi|678213943|gb|KFB80922.1|  
 gi|678117094|gb|KFD92570.1|  
 gi|677460376|gb|KFK49790.1|  
 gi|676240922|gb|KFO04794.1|  
 gi|327274492|ref|XP\_003222011.1|  
 gi|697035938|ref|XP\_009560305.1|  
 gi|679144654|gb|KFW71726.1|  
 gi|677478626|gb|KFO68031.1|  
 gi|677536446|gb|KFO98355.1|  
 gi|675309850|gb|KFM05112.1|  
 gi|677485789|gb|KFK75194.1|  
 gi|677065660|gb|KFP25666.1|  
 gi|677385324|gb|KFO06625.1|  
 gi|678999197|gb|KFW02769.1|  
 gi|683460598|gb|KFP25531.1|  
 gi|678186697|gb|KFW54419.1|  
 gi|677306180|gb|KFP88608.1|

Panel 1.B

gi|679184771|gb|KFW76182.1|  
gi|694667236|ref|XP\_009487955.1|  
gi|677475561|gb|KFQ64975.1|  
gi|676813263|gb|KFP09651.1|  
gi|677240187|gb|KFP55213.1|  
gi|602634684|ref|XP\_007424213.1|  
gi|678141214|gb|KFV10386.1|  
gi|676772626|gb|KFP01083.1|  
gi|678171735|gb|KFV39739.1|  
gi|677419357|gb|KFQ23881.1|  
gi|677154760|gb|KFP42681.1|  
gi|529418081|ref|XP\_005228921.1|  
gi|683463360|gb|KFZ57577.1|  
gi|679009339|gb|KFW08712.1|  
gi|678129745|gb|KFU98931.1|  
gi|676700994|gb|KFO83399.1|  
gi|449492221|ref|XP\_002194000.2|  
gi|677551796|gb|KFR11971.1|  
gi|677386179|gb|KFQ07179.1|  
gi|543253201|ref|XP\_005418647.1|  
gi|683900638|ref|XP\_009084179.1|  
gi|542142447|ref|XP\_005480328.1|  
gi|669272197|ref|XP\_008628114.1|  
gi|696975798|ref|XP\_009557373.1|  
gi|543727822|ref|XP\_005505003.1|  
gi|541950812|ref|XP\_005432194.1|  
gi|676412340|gb|KFO56234.1|  
gi|632960773|ref|XP\_007896385.1|  
gi|678203612|gb|KFV70593.1|  
gi|301619343|ref|XP\_002939053.1|  
gi|573893286|ref|XP\_006634396.1|  
gi|597773568|ref|XP\_007250519.1|  
gi|565311372|gb|ETE64260.1|  
gi|543727820|ref|XP\_005505002.1|  
gi|527270059|ref|XP\_005152999.1|  
gi|504139796|ref|XP\_004582346.1|  
gi|683448681|gb|KFZ47013.1|  
gi|332206689|ref|XP\_003252429.1|  
gi|532030832|ref|XP\_005358358.1|  
gi|675704298|ref|XP\_008960302.1|  
gi|348578733|ref|XP\_003475137.1|  
gi|543253199|ref|XP\_005418646.1|  
gi|694922370|ref|XP\_009451808.1|  
gi|426356830|ref|XP\_004045756.1|  
gi|677449625|gb|KFQ41817.1|  
gi|449492223|ref|XP\_004175550.1|  
gi|602634686|ref|XP\_007424214.1|  
gi|677415485|gb|KFQ21444.1|  
gi|124249344|ref|NP\_083010.2|  
gi|50732453|ref|XP\_418643.1|  
gi|281183125|ref|NP\_001162460.1|  
gi|195977102|gb|ACG63652.1|  
gi|100913194|ref|NP\_001035755.1|  
gi|640797080|ref|XP\_008054658.1|  
gi|677364635|gb|KFP94340.1|  
gi|589949126|ref|XP\_006987221.1|  
gi|157822623|ref|NP\_001101316.1|  
gi|585679651|ref|XP\_006891518.1|  
gi|678131271|gb|KFV00458.1|  
gi|354484537|ref|XP\_003504443.1|  
gi|395818576|ref|XP\_003782700.1|  
gi|507575192|ref|XP\_004671141.1|  
gi|683461848|gb|KFZ56336.1|  
gi|586554620|ref|XP\_006925767.1|  
gi|674094853|ref|XP\_008820734.1|  
gi|675673444|ref|XP\_009000757.1|  
gi|543346265|ref|XP\_005518841.1|  
gi|695160354|ref|XP\_009508353.1|  
gi|542142445|ref|XP\_005480327.1|  
gi|669272199|ref|XP\_008628115.1|  
gi|507645758|ref|XP\_004702705.1|  
gi|677551795|gb|KFR11970.1|  
gi|694627755|ref|XP\_0094899670.1|  
gi|410952220|ref|XP\_003982781.1|  
gi|677478807|gb|KFQ68212.1|  
gi|676240131|gb|KFO04003.1|  
gi|678979715|gb|KFV91966.1|  
gi|557292177|ref|XP\_006028621.1|  
gi|670986761|ref|XP\_008664437.1|  
gi|507710290|ref|XP\_004646881.1|  
gi|344270748|ref|XP\_003407205.1|  
gi|641692775|ref|XP\_008147506.1|  
gi|524985848|ref|XP\_005040882.1|  
gi|281350065|gb|EFB25649.1|  
gi|149580298|ref|XP\_001510572.1|  
gi|683900641|ref|XP\_009084180.1|  
gi|675407220|ref|XP\_008932021.1|  
gi|511830094|ref|XP\_004739745.1|  
gi|512867106|ref|XP\_004891354.1|  
gi|696975801|ref|XP\_009557374.1|  
gi|327274494|ref|XP\_003222012.1|  
gi|488586811|ref|XP\_004478736.1|  
gi|564230512|ref|XP\_006259683.1|  
gi|663262004|ref|XP\_008492351.1|  
gi|686595792|ref|XP\_009273957.1|  
gi|507930963|ref|XP\_004676725.1|  
gi|697032336|ref|XP\_009578311.1|  
gi|677370074|gb|KFP96995.1|  
gi|677198961|gb|KFP47034.1|  
gi|524968287|ref|XP\_005084029.1|  
gi|533147263|ref|XP\_005388043.1|  
gi|678183296|gb|KFV51018.1|  
gi|284005332|ref|NP\_001164746.1|  
gi|149705447|ref|XP\_001490082.1|  
gi|677489486|gb|KFQ78891.1|  
gi|471395599|ref|XP\_004381563.1|  
gi|335295337|ref|XP\_003357471.1|  
gi|562883066|ref|XP\_006169066.1|  
gi|431839043|gb|ELK00971.1|  
gi|697481148|ref|XP\_009672526.1|  
gi|690459529|ref|XP\_009328805.1|  
gi|514739113|ref|XP\_005017952.1|  
gi|472348933|ref|XP\_004394170.1|  
gi|529418083|ref|XP\_005228922.1|  
gi|395540030|ref|XP\_003771965.1|





Panel 1.E

|                                 |  |  |      |  |            |
|---------------------------------|--|--|------|--|------------|
| gi 426227818 ref XP_004008012.1 |  |  |      |  |            |
| gi 556762761 ref XP_005976673.1 |  |  |      |  |            |
| gi 478514250 ref XP_004431376.1 |  |  |      |  |            |
| gi 504139789 ref XP_004582343.1 |  |  |      |  |            |
| gi 591384664 ref XP_007066785.1 |  |  |      |  |            |
| gi 431839048 gb ELK00976.1      |  |  |      |  |            |
| gi 591299567 ref XP_007076799.1 |  |  |      |  |            |
| gi 642101771 emb CDQ76188.1     |  |  |      |  |            |
| gi 558213257 ref XP_006134172.1 |  |  | MKPL |  | SYYYLLC 11 |
| gi 586554628 ref XP_006925771.1 |  |  |      |  |            |
| gi 617463244 ref XP_00572760.1  |  |  |      |  |            |
| gi 585154586 ref XP_006729650.1 |  |  |      |  |            |
| gi 593730883 ref XP_007111076.1 |  |  |      |  |            |
| gi 560979331 ref XP_006211922.1 |  |  |      |  |            |
| gi 560925797 ref XP_006189080.1 |  |  |      |  |            |
| gi 617642095 ref XP_007531980.1 |  |  |      |  |            |
| gi 281347098 gb EFB22682.1      |  |  |      |  |            |
| gi 472383394 ref XP_004411076.1 |  |  |      |  |            |
| gi 301756344 ref XP_002914022.1 |  |  |      |  |            |
| gi 326921724 ref XP_003207106.1 |  |  |      |  |            |
| gi 602704474 ref XP_007446805.1 |  |  |      |  |            |
| gi 532110716 ref XP_005340062.1 |  |  |      |  |            |
| gi 670986751 ref XP_008684432.1 |  |  |      |  |            |
| gi 544421694 ref XP_005550352.1 |  |  |      |  |            |
| gi 471395586 ref XP_004381559.1 |  |  |      |  |            |
| gi 332206641 ref XP_003252407.1 |  |  |      |  |            |
| gi 635115010 ref XP_007980452.1 |  |  |      |  |            |
| gi 109067578 ref XP_001104041.1 |  |  |      |  |            |
| gi 483515133 gb E0B02513.1      |  |  |      |  |            |
| gi 402864294 ref XP_003896407.1 |  |  |      |  |            |
| gi 679009785 gb KFW08962.1      |  |  |      |  |            |
| gi 657790068 ref XP_008321837.1 |  |  |      |  |            |
| gi 344270753 ref XP_003407207.1 |  |  |      |  |            |
| gi 465984774 ref XP_004265679.1 |  |  |      |  |            |
| gi 100815815 ref NP_078912.2    |  |  |      |  |            |
| gi 426356807 ref XP_004045745.1 |  |  |      |  |            |
| gi 55628944 ref XP_527809.1     |  |  |      |  |            |
| gi 296209755 ref XP_002751668.1 |  |  |      |  |            |
| gi 297681122 ref XP_002818315.1 |  |  |      |  |            |
| gi 403257216 ref XP_003921225.1 |  |  |      |  |            |
| gi 564244487 ref XP_006261377.1 |  |  |      |  |            |
| gi 586450897 ref XP_006834379.1 |  |  |      |  |            |
| gi 557260663 ref XP_006015971.1 |  |  |      |  |            |
| gi 667273517 ref XP_008571690.1 |  |  |      |  |            |
| gi 507930953 ref XP_004676720.1 |  |  |      |  |            |
| gi 514739105 ref XP_005017950.1 |  |  | MP   |  | 2          |
| gi 677057004 gb KFP23881.1      |  |  |      |  |            |
| gi 470640506 ref XP_004325219.1 |  |  |      |  |            |
| gi 678145287 gb KFV14453.1      |  |  |      |  |            |
| gi 657789586 ref XP_008321572.1 |  |  |      |  |            |
| gi 640815258 ref XP_008064391.1 |  |  |      |  |            |
| gi 543727826 ref XP_005505005.1 |  |  | MP   |  | 2          |
| gi 594636285 ref XP_007171542.1 |  |  |      |  |            |
| gi 262063564 ref NP_001159961.1 |  |  |      |  |            |
| gi 584041383 ref XP_006779243.1 |  |  |      |  |            |
| gi 677482698 gb KFQ72103.1      |  |  |      |  |            |
| gi 126341543 ref XP_001377787.1 |  |  |      |  |            |
| gi 597799143 ref XP_007261108.1 |  |  |      |  |            |
| gi 507557180 ref XP_004662336.1 |  |  |      |  |            |
| gi 597748725 ref XP_007236319.1 |  |  |      |  |            |
| gi 676772623 gb KFP01080.1      |  |  |      |  |            |
| gi 658895934 ref XP_008430820.1 |  |  |      |  |            |
| gi 663261998 ref XP_008492349.1 |  |  |      |  |            |
| gi 678214307 gb KFV81286.1      |  |  |      |  |            |
| gi 675309853 gb KFM05115.1      |  |  |      |  |            |
| gi 62955445 ref NP_001017734.1  |  |  |      |  |            |
| gi 602643791 ref XP_007428353.1 |  |  | MA   |  | 2          |
| gi 676720236 gb KFO89856.1      |  |  |      |  |            |
| gi 679216243 gb KFN94833.1      |  |  |      |  |            |
| gi 695163616 ref XP_009510156.1 |  |  |      |  |            |
| gi 521032115 gb EPQ13901.1      |  |  |      |  |            |
| gi 554563717 ref XP_005876182.1 |  |  |      |  |            |
| gi 686595796 ref XP_009273959.1 |  |  |      |  |            |
| gi 558171384 ref XP_006099145.1 |  |  | MP   |  | 2          |
| gi 677536450 gb KFO98359.1      |  |  |      |  |            |
| gi 679144657 gb KFW71729.1      |  |  |      |  |            |
| gi 677222689 gb KFP50613.1      |  |  |      |  |            |
| gi 694847617 ref XP_009464898.1 |  |  | MP   |  | 2          |
| gi 677302700 gb KFP85128.1      |  |  |      |  |            |
| gi 678192031 gb KFW59725.1      |  |  |      |  |            |
| gi 677380957 gb KFO03816.1      |  |  |      |  |            |
| gi 690459533 ref XP_009328808.1 |  |  | MP   |  | 2          |
| gi 292617388 ref XP_002663339.1 |  |  |      |  |            |
| gi 527270063 ref XP_005153001.1 |  |  |      |  |            |
| gi 410905459 ref XP_003966209.1 |  |  | ML   |  | 2          |
| gi 678117091 gb KFO92567.1      |  |  |      |  |            |
| gi 678173365 gb KFW41361.1      |  |  |      |  |            |
| gi 432908525 ref XP_004077904.1 |  |  |      |  |            |
| gi 529418079 ref XP_005228920.1 |  |  |      |  |            |
| gi 677399646 gb KFO14863.1      |  |  |      |  |            |
| gi 541950816 ref XP_005432195.1 |  |  |      |  |            |
| gi 678144582 gb KFW13748.1      |  |  |      |  |            |
| gi 112984288 ref NP_001037730.1 |  |  |      |  |            |
| gi 532030822 ref XP_005358353.1 |  |  |      |  |            |
| gi 677769649 ref XP_009082926.1 |  |  |      |  |            |
| gi 676251117 gb KFO14989.1      |  |  |      |  |            |
| gi 543253204 ref XP_005418648.1 |  |  |      |  |            |
| gi 677147066 gb KFP04088.1      |  |  |      |  |            |
| gi 642120318 emb CDQ64940.1     |  |  |      |  |            |
| gi 677553655 gb KFR13417.1      |  |  |      |  |            |
| gi 677457512 gb KFO46926.1      |  |  |      |  |            |
| gi 589949118 ref XP_006987217.1 |  |  |      |  |            |
| gi 632986449 ref XP_007910245.1 |  |  |      |  |            |
| gi 677417976 gb KFO23007.1      |  |  |      |  |            |
| gi 677469944 gb KFO59358.1      |  |  |      |  |            |
| gi 31981509 ref NP_473439.2     |  |  |      |  |            |
| gi 524985734 ref XP_005040826.1 |  |  |      |  |            |
| gi 47225470 emb CAG11953.1      |  |  |      |  |            |
| gi 657537742 ref XP_008275282.1 |  |  |      |  |            |
| gi 677274891 gb KFP66209.1      |  |  |      |  |            |
| gi 679184773 gb KFW6184.1       |  |  |      |  |            |
| gi 694637176 ref XP_009477232.1 |  |  | MS   |  | 2          |
| gi 345307590 ref XP_001509103.2 |  |  |      |  |            |
| gi 675407224 ref XP_008932024.1 |  |  |      |  |            |
| gi 658895943 ref XP_008430825.1 |  |  |      |  |            |



Panel 2.A

|                                 |     |     |     |     |     |
|---------------------------------|-----|-----|-----|-----|-----|
| gi 9558759 ref NP_036581.1      | 100 | 120 | 140 | 160 | 180 |
| gi 114614402 ref XP_001164872.1 |     |     |     |     |     |
| gi 109067567 ref XP_001103605.1 |     |     |     |     |     |
| gi 297681115 ref XP_002818311.1 |     |     |     |     |     |
| gi 635114985 ref XP_007980441.1 |     |     |     |     |     |
| gi 281183115 ref NP_001162459.1 |     |     |     |     |     |
| gi 332206685 ref XP_003252427.1 |     |     |     |     |     |
| gi 675704305 ref XP_008960306.1 |     |     |     |     |     |
| gi 355747866 gb EHH52363.1      |     |     |     |     |     |
| gi 403257228 ref XP_003921231.1 |     |     |     |     |     |
| gi 167427288 gb ABZ80265.1      |     |     |     |     |     |
| gi 296209751 ref XP_002751667.1 |     |     |     |     |     |
| gi 168986657 gb ACA35052.1      |     |     |     |     |     |
| gi 545522297 ref XP_005628542.1 |     |     |     |     |     |
| gi 562883058 ref XP_006169062.1 |     |     |     |     |     |
| gi 640797078 ref XP_008054657.1 |     |     |     |     |     |
| gi 284005327 ref NP_001164785.1 |     |     |     |     |     |
| gi 47523676 ref NP_999470.1     |     |     |     |     |     |
| gi 465984745 ref XP_004265676.1 |     |     |     |     |     |
| gi 602733452 ref XP_007452111.1 |     |     |     |     |     |
| gi 532098195 ref XP_005334745.1 |     |     |     |     |     |
| gi 488586809 ref XP_004478735.1 |     |     |     |     |     |
| gi 472348935 ref XP_004394171.1 |     |     |     |     |     |
| gi 593759248 ref XP_007118379.1 |     |     |     |     |     |
| gi 585167015 ref XP_006735605.1 |     |     |     |     |     |
| gi 471395595 ref XP_004381562.1 |     |     |     |     |     |
| gi 548463586 ref XP_005679360.1 |     |     |     |     |     |
| gi 470652036 ref XP_004329145.1 |     |     |     |     |     |
| gi 426227822 ref XP_004008014.1 |     |     |     |     |     |
| gi 594104641 ref XP_006075297.1 |     |     |     |     |     |
| gi 634845395 ref XP_007938026.1 |     |     |     |     |     |
| gi 591299555 ref XP_007076794.1 |     |     |     |     |     |
| gi 667308743 ref XP_008583828.1 |     |     |     |     |     |
| gi 344270750 ref XP_003407206.1 |     |     |     |     |     |
| gi 410952218 ref XP_003982780.1 |     |     |     |     |     |
| gi 560979325 ref XP_006211919.1 |     |     |     |     |     |
| gi 560936071 ref XP_006193855.1 |     |     |     |     |     |
| gi 533147257 ref XP_005388040.1 |     |     |     |     |     |
| gi 177773086 gb ACB73280.1      |     |     |     |     |     |
| gi 556762767 ref XP_005976676.1 |     |     |     |     |     |
| gi 594697428 ref XP_007195873.1 |     |     |     |     |     |
| gi 194209596 ref XP_001492607.2 |     |     |     |     |     |
| gi 329663204 ref NP_001192735.1 |     |     |     |     |     |
| gi 670986759 ref XP_008684436.1 |     |     |     |     |     |
| gi 507646395 ref XP_004702858.1 |     |     |     |     |     |
| gi 586554622 ref XP_006925768.1 |     |     |     |     |     |
| gi 507930961 ref XP_004676724.1 |     |     |     |     |     |
| gi 478514256 ref XP_004431379.1 |     |     |     |     |     |
| gi 395818574 ref XP_003782699.1 |     |     |     |     |     |
| gi 558107925 ref XP_006084992.1 |     |     |     |     |     |
| gi 281350064 gb EFB25648.1      |     |     |     |     |     |
| gi 641692779 ref XP_008147526.1 |     |     |     |     |     |
| gi 514471127 ref XP_003475031.2 |     |     |     |     |     |
| gi 554563711 ref XP_005876179.1 |     |     |     |     |     |
| gi 512867117 ref XP_004891357.1 |     |     |     |     |     |
| gi 586451062 ref XP_006878402.1 |     |     |     |     |     |
| gi 584041388 ref XP_006779245.1 |     |     |     |     |     |
| gi 301769711 ref XP_002920273.1 |     |     |     |     |     |
| gi 674094851 ref XP_008820733.1 |     |     |     |     |     |
| gi 354484535 ref XP_003504442.1 |     |     |     |     |     |
| gi 589949124 ref XP_006987220.1 |     |     |     |     |     |
| gi 507575190 ref XP_004671140.1 |     |     |     |     |     |
| gi 254553462 ref NP_081675.2    |     |     |     |     |     |
| gi 157817514 ref NP_001100099.1 |     |     |     |     |     |
| gi 511830092 ref XP_004739744.1 |     |     |     |     |     |
| gi 524968285 ref XP_005084028.1 |     |     |     |     |     |
| gi 504139794 ref XP_004582345.1 |     |     |     |     |     |
| gi 532030830 ref XP_005358357.1 |     |     |     |     |     |
| gi 617633976 ref XP_007530280.1 |     |     |     |     |     |
| gi 585679781 ref XP_006891553.1 |     |     |     |     |     |
| gi 505775878 ref XP_004602338.1 |     |     |     |     |     |
| gi 395540028 ref XP_003771964.1 |     |     |     |     |     |
| gi 126341322 ref XP_001368631.1 |     |     |     |     |     |
| gi 591381645 ref XP_007065358.1 |     |     |     |     |     |
| gi 558122566 ref XP_006114505.1 |     |     |     |     |     |
| gi 465965470 gb EMP30673.1      |     |     |     |     |     |
| gi 530577003 ref XP_005282462.1 |     |     |     |     |     |
| gi 564230520 ref XP_006259687.1 |     |     |     |     |     |
| gi 557325124 ref XP_006035579.1 |     |     |     |     |     |
| gi 695138615 ref XP_009510760.1 |     |     |     |     |     |
| gi 514739109 ref XP_005017951.1 |     |     |     |     |     |
| gi 543346262 ref XP_005518840.1 |     |     |     |     |     |
| gi 675407222 ref XP_008932023.1 |     |     |     |     |     |
| gi 677239856 gb KFP55094.1      |     |     |     |     |     |
| gi 686595794 ref XP_009273958.1 |     |     |     |     |     |
| gi 690459531 ref XP_009328807.1 |     |     |     |     |     |
| gi 326921728 ref XP_003207108.1 |     |     |     |     |     |
| gi 118085789 ref XP_418642.2    |     |     |     |     |     |
| gi 527270061 ref XP_005153000.1 |     |     |     |     |     |
| gi 524985846 ref XP_005040881.1 |     |     |     |     |     |
| gi 694847615 ref XP_009464897.1 |     |     |     |     |     |
| gi 676264854 gb KFO21189.1      |     |     |     |     |     |
| gi 679187928 gb KFW78811.1      |     |     |     |     |     |
| gi 677444859 gb KFO39506.1      |     |     |     |     |     |
| gi 675607450 ref XP_008947618.1 |     |     |     |     |     |
| gi 663262001 ref XP_008492350.1 |     |     |     |     |     |
| gi 678213943 gb KFW80922.1      |     |     |     |     |     |
| gi 678117094 gb KFO92570.1      |     |     |     |     |     |
| gi 677460376 gb KFO49790.1      |     |     |     |     |     |
| gi 676240922 gb KFO04794.1      |     |     |     |     |     |
| gi 327274492 ref XP_003222011.1 |     |     |     |     |     |
| gi 697035938 ref XP_009580305.1 |     |     |     |     |     |
| gi 679144654 gb KFW71726.1      |     |     |     |     |     |
| gi 677478626 gb KFO68031.1      |     |     |     |     |     |
| gi 677536446 gb KFO98355.1      |     |     |     |     |     |
| gi 675309850 gb KFO51112.1      |     |     |     |     |     |
| gi 677485789 gb KFO75194.1      |     |     |     |     |     |
| gi 677065660 gb KFO25666.1      |     |     |     |     |     |
| gi 677385324 gb KFO06625.1      |     |     |     |     |     |
| gi 678999197 gb KFO2769.1       |     |     |     |     |     |
| gi 683460598 gb KFO25531.1      |     |     |     |     |     |
| gi 678186697 gb KFO54419.1      |     |     |     |     |     |
| gi 677306180 gb KFO88608.1      |     |     |     |     |     |













```

      gi|9558759|ref|NP_036581.1| ..... 200 Panel 3.A ..... 240 ..... 260
gi|114614402|ref|XP_001164872.1| .....
gi|109067567|ref|XP_001103605.1| .....
gi|297681115|ref|XP_002818311.1| .....
gi|635114985|ref|XP_007980441.1| .....
gi|281183115|ref|NP_001162459.1| .....
gi|332206685|ref|XP_003252427.1| .....
gi|675704305|ref|XP_008960306.1| .....
gi|355747866|gb|EHH52363.1| .....
gi|403257228|ref|XP_003921231.1| .....
gi|167427288|gb|ABZ80265.1| .....
gi|296209751|ref|XP_002751667.1| .....
gi|168986657|gb|ACA35052.1| .....
gi|545522297|ref|XP_005628542.1| .....
gi|562883058|ref|XP_006169062.1| .....
gi|640797078|ref|XP_008054657.1| .....
gi|284005327|ref|NP_001164745.1| .....
gi|47523676|ref|NP_999470.1| .....
gi|465984745|ref|XP_004265676.1| .....
gi|602733452|ref|XP_007452111.1| .....
gi|532098195|ref|XP_005334745.1| .....
gi|488586809|ref|XP_004478735.1| .....
gi|472348935|ref|XP_004394171.1| .....
gi|593759248|ref|XP_007118379.1| .....
gi|585167015|ref|XP_006735605.1| .....
gi|471395595|ref|XP_004381562.1| .....
gi|548463586|ref|XP_005679360.1| .....
gi|470652036|ref|XP_004329145.1| .....
gi|426227822|ref|XP_004008014.1| .....
gi|594104641|ref|XP_006075297.1| .....
gi|634845395|ref|XP_007938026.1| .....
gi|591299555|ref|XP_007076794.1| .....
gi|667308743|ref|XP_008583828.1| .....
gi|344270750|ref|XP_003407206.1| .....
gi|410952218|ref|XP_003982780.1| .....
gi|560979325|ref|XP_006211919.1| .....
gi|560936071|ref|XP_006193855.1| .....
gi|533147257|ref|XP_005388040.1| .....
MSA YYLESRES VF 13
gi|177773086|gb|ACB73280.1| .....
gi|556762767|ref|XP_005976676.1| .....
gi|594697428|ref|XP_007195873.1| .....
gi|194209596|ref|XP_001492607.2| .....
gi|329663204|ref|NP_001192735.1| .....
gi|670986759|ref|XP_008684436.1| .....
gi|507646395|ref|XP_004702858.1| .....
gi|586554622|ref|XP_006925768.1| .....
gi|507930961|ref|XP_004676724.1| .....
gi|478514256|ref|XP_004431379.1| .....
gi|395818574|ref|XP_003782699.1| .....
gi|558107925|ref|XP_006084992.1| .....
gi|281350064|gb|EFB25648.1| .....
gi|641692779|ref|XP_008147526.1| .....
gi|514471127|ref|XP_003475031.2| .....
gi|554563711|ref|XP_005876179.1| .....
gi|512867117|ref|XP_004891357.1| .....
gi|586451062|ref|XP_006878402.1| .....
M I G 3
gi|584041388|ref|XP_006779245.1| .....
gi|301769711|ref|XP_002920273.1| .....
MFVPREI NE SGR SRPLAEDG SLKENRERPG CNVGKPLVRP LGPPRTVPPR 50
gi|674094851|ref|XP_008820733.1| .....
gi|354484535|ref|XP_003504442.1| .....
gi|589949124|ref|XP_006987220.1| .....
gi|507575190|ref|XP_004671140.1| .....
gi|254553462|ref|NP_081675.2| .....
gi|157817514|ref|NP_001100099.1| .....
gi|511830092|ref|XP_004739744.1| .....
gi|524968285|ref|XP_005084028.1| .....
gi|504139794|ref|XP_004582345.1| .....
gi|532030830|ref|XP_005358357.1| .....
gi|617633976|ref|XP_007530280.1| .....
gi|585679781|ref|XP_006891553.1| .....
gi|505775878|ref|XP_004602338.1| .....
gi|395540028|ref|XP_003771964.1| .....
gi|126341322|ref|XP_001368631.1| .....
gi|591381645|ref|XP_007065358.1| .....
gi|558122566|ref|XP_006114505.1| .....
gi|465965470|gb|EMP30673.1| .....
gi|530577003|ref|XP_005282462.1| .....
gi|564230520|ref|XP_006259687.1| .....
gi|557325124|ref|XP_006035579.1| .....
gi|695138615|ref|XP_009510760.1| .....
gi|514739109|ref|XP_005017951.1| .....
gi|543346262|ref|XP_005518840.1| .....
gi|675407222|ref|XP_008932023.1| .....
gi|677239856|gb|KFP55094.1| .....
gi|686595794|ref|XP_009273958.1| .....
gi|690459531|ref|XP_009328807.1| .....
gi|326921728|ref|XP_003207108.1| .....
gi|118085789|ref|XP_418642.2| .....
gi|527270061|ref|XP_005153000.1| .....
gi|524985846|ref|XP_005040881.1| .....
gi|694847615|ref|XP_009464897.1| .....
SLSET FLPNGI N GI K DAR KVTVGVI G S G D FAKSLTI RL I RCGYHVVI G SRNPKFAS E 65
gi|676264854|gb|KFO21189.1| .....
gi|679187928|gb|KFW78811.1| .....
gi|677444859|gb|KFO39506.1| .....
gi|675607450|ref|XP_008947618.1| .....
gi|663262001|ref|XP_008492350.1| .....
gi|678213943|gb|KFV80922.1| .....
gi|678117094|gb|KFU92570.1| .....
gi|677460376|gb|KFQ49790.1| .....
gi|676240922|gb|KFO04794.1| .....
gi|327274492|ref|XP_003222011.1| .....
gi|697035938|ref|XP_009580305.1| .....
gi|679144654|gb|KFW71726.1| .....
gi|677478626|gb|KFO68031.1| .....
gi|677536446|gb|KFO98355.1| .....
gi|675309850|gb|KFM05112.1| .....
gi|677485789|gb|KFQ75194.1| .....
gi|677065660|gb|KFP25666.1| .....
gi|677385324|gb|KFO06625.1| .....
gi|678999197|ref|XP_00792769.1| .....
gi|683460598|gb|KFP25531.1| .....
gi|678186697|gb|KFW54419.1| .....
gi|677306180|gb|KFP88608.1| .....

```







Panel 3.D

Table with columns for identifiers (e.g., gi|556769052), gene names (e.g., KMDKP, EMDKP), protein domains (e.g., S DGS LAEAPSE), amino acid positions (e.g., VPKVGI LGS G), and accession numbers (e.g., SRNP KRMA-G 132).



Panel 3.F

|                                 |             |            |               |       |         |            |               |               |             |             |     |     |
|---------------------------------|-------------|------------|---------------|-------|---------|------------|---------------|---------------|-------------|-------------|-----|-----|
| gi 678203614 gb KFV70595.1      | ----- RNS - | SNTMALAP - | -----         | STANK | KEVVCI  | FGTG       | DFGRALGQKL    | I QSGYRVVFG   | SRRSTKLS -  | S           | 54  |     |
| gi 449492447 ref XP_002193727.2 | -----       | MMALAP -   | -----         | NTSNK | RETVCI  | FGTG       | DFGRALGHKM    | I QSGYRVVYG   | SRRSTQIS -  | N           | 49  |     |
| gi 677488410 gb RFQ77815.1      | -----       | MSKNS -    | SNI MALAP -   | ----- | NTSSK   | RETVCI     | DFGRALGHKL    | I QSGYRVVFG   | SRRSTQTS -  | T           | 56  |     |
| gi 551506445 ref XP_005804755.1 | -----       | EVKPE S -  | MSLYPAS A -   | ----- | AAANPE  | QEAVCI     | DLGRSLGQRL    | LQSGYRLVYG    | SRRRPHSC -  | G           | 60  |     |
| gi 676412338 gb KFO56232.1      | -----       | MNKNS -    | SNI MALAP -   | ----- | NTSNK   | RETVCI     | DFGRALGHKM    | I QSGYRVVYG   | SRRSTQIS -  | N           | 56  |     |
| gi 291190416 ref NP_001167369.1 | -----       | EEKS EC -  | VSMS P MMEA - | ----- | DPALPE  | SERVCFVFTG | DLGHSGLRL     | LQAGYGVVFG    | SRRRPHSC -  | S           | 66  |     |
| gi 669272195 ref XP_008628113.1 | -----       | MNKNS -    | SNI MALAP -   | ----- | NTSNK   | RETVCI     | DFGRALGHKM    | I QSGYRVVYG   | SRRSTQIS -  | N           | 56  |     |
| gi 543346256 ref XP_005518838.1 | -----       | MTKNS -    | SNI MALAP -   | ----- | NTSNK   | RETVCI     | DFGRALGHKM    | I QSGYRVVYG   | SRRSTQIS -  | N           | 56  |     |
| gi 542142451 ref XP_005480330.1 | -----       | MNKNS -    | SNTMALAP -    | ----- | NTSNK   | RETVCI     | DFGRALGHKM    | I QSGYRVVYG   | SRRSTQIS -  | N           | 56  |     |
| gi 327274760 ref XP_003222144.1 | -----       | MEKN       | STI I PLTS -  | ----- | DLLNK   | KETVCI     | DFGRSLGYKM    | LQCGYSI VYG   | SRRNPQAS -  | G           | 55  |     |
| gi 513168239 ref XP_001235257.3 | -----       | MNKNS -    | SNI MALAP -   | ----- | KTSNK   | RETVCI     | DFGRALGHKL    | I QSGYRVVFG   | SRRSPPWS -  | S           | 56  |     |
| gi 565316654 gb ETE68273.1      | -----       | MSGLEKV    | NAMI PLTS -   | ----- | DMPNK   | KEI VCI    | DFGRSLGYKL    | MQCGYSI VYG   | SRRSTQNS -  | G           | 58  |     |
| gi 683467094 gb RFZ61303.1      | -----       | MNKNS -    | SNI MALAP -   | ----- | NTSNK   | RETVCI     | DFGRALGHKM    | I QSGYRVVFG   | SRRSTQKS -  | S           | 56  |     |
| gi 683900635 ref XP_009084178.1 | -----       | MNKNP -    | SNTMALAP -    | ----- | NTSNK   | RETVCI     | DFGRALGHKM    | I QAGYRVVYG   | SRRSTQIS -  | N           | 56  |     |
| gi 505775871 ref XP_004602336.1 | -----       | MEKS       | TDAI ALTM -   | ----- | NSSEK   | LETI CI    | DFGRSLGLKM    | LQCGYSI I F G | SRRNPQKC -  | N           | 55  |     |
| gi 676275116 gb KFO29573.1      | -----       | GMENPC -   | PNVLP LNM -   | ----- | NSSRK   | QETVCI     | DFGRSLGLKM    | LHCYGS VVFG   | SRRNPQMS -  | S           | 82  |     |
| gi 696975795 ref XP_009557372.1 | -----       | MNRNS -    | YNI MALAP -   | ----- | NTSKK   | RETVCI     | DFGRALGHKM    | I QSGYRVVFG   | SRRSAQTS -  | S           | 56  |     |
| gi 676586017 gb KFO74821.1      | -----       | MNRNS -    | YNI MALAP -   | ----- | NTSKK   | RETVCI     | DFGRALGHKM    | I QSGYRVVFG   | SRRSAQTS -  | S           | 56  |     |
| gi 679006701 gb KFW07166.1      | -----       | MNKNS -    | SNI MALAP -   | ----- | NTPNK   | RETVCI     | DFGRALGHKI    | I QAGYRVVFG   | SRRSTQTS -  | S           | 56  |     |
| gi 676813260 gb KFP09648.1      | -----       | MNKNS -    | SNTMALAP -    | ----- | NTSNK   | RQTVCFVFTG | DFGRALGHKM    | I QSGYRVVFG   | SRRSAQTS -  | S           | 56  |     |
| gi 697032879 ref XP_009578615.1 | -----       | QMNKNS -   | SNI MALAP -   | ----- | NTPNK   | RETVCI     | DFGRALGHKI    | I QAGYRVVFG   | SRRSTQTS -  | S           | 108 |     |
| gi 354488334 ref XP_003506325.1 | -----       | MEKTC -    | ADALPLTV -    | ----- | NSSEK   | QETVCI     | DFGKSF GFKM   | LQCGYS VVLG   | SRRNPQMS -  | S           | 56  |     |
| gi 507713563 ref XP_004647823.1 | -----       | MENSC -    | TNAFPLTM -    | ----- | NSSQK   | QETVCI     | DFGRSLGLKM    | LQCGYAVVFG    | SRRNPQMS -  | S           | 56  |     |
| gi 524968279 ref XP_005084025.1 | -----       | MEKTG -    | ADALPLTV -    | ----- | NSTEK   | QETI CI    | DFGKSLGFKM    | LQCGYS VVFG   | SRRNPQMS -  | S           | 56  |     |
| gi 410905463 ref XP_003966211.1 | -----       |            |               | ----- |         | MGI        | FGTG          | DLGRSLGLRL    | LQSGYRVVYG  | SRRRPHSC -  | G   | 35  |
| gi 548400752 ref XP_005738595.1 | -----       | MKTEG -    | A - - MLHQLA  | ----- | S GDGPE | PELMCI     | FGTG          | DLGRSLGLCL    | LQSGYRVVYG  | SRRRPHSC -  | G   | 56  |
| gi 498938966 ref XP_004541746.1 | -----       | MKTEG -    | A - - MLHPLA  | ----- | S GDGPE | PELMCI     | FGTG          | DLGRSLGLCL    | LQSGYRVVYG  | SRRRPHSC -  | G   | 56  |
| gi 675614756 ref XP_008936236.1 | -----       | MTKNS -    | SNI MALSP -   | ----- | NTSNK   | RETVCI     | DFGRALGLKM    | I QSGYRVVFG   | SRRSTQTS -  | S           | 56  |     |
| gi 348578509 ref XP_003475025.1 | -----       | MENPC -    | MNALPLTM -    | ----- | TSSQK   | QVTVCI     | DFGRSLGLKM    | LQCGHVVVYG    | SRRNPQMS -  | S           | 56  |     |
| gi 548400757 ref XP_005738596.1 | -----       | EVNS ES -  | VS LCP LST -  | ----- | AAATE   | QEMLCI     | FGTG          | DLGRSLGQRL    | FQTGYKVVYG  | SRRRPHSC -  | G   | 60  |
| gi 554854825 ref XP_005937599.1 | -----       | EVNS ES -  | VS LCP LST -  | ----- | PAATE   | QEMLCI     | FGTG          | DLGRSLGQRL    | FQTGYKVVYG  | SRRRPHSC -  | G   | 60  |
| gi 584013191 ref XP_006801411.1 | -----       | EVNS ES -  | VS LCP LST -  | ----- | AAATE   | QEMLCI     | FGTG          | DLGRSLGQRL    | LQTGYKVVYG  | SRRRPHSC -  | G   | 60  |
| gi 498937702 ref XP_004541468.1 | -----       | EVNS ES -  | VS LCP LST -  | ----- | PAATE   | QEMLCI     | FGTG          | DLGRSLGQRL    | FQTGYKVVYG  | SRRRPHSC -  | G   | 60  |
| gi 664765458 ref XP_008540415.1 | -----       | EMDKP -    | LI SRRLLV D   | ----- | S       | DGSLAEAPSE | APKVG I LGS G | DFARSLATRL    | VGS GFVVVYG | SRRNPKRMA - | G   | 102 |

G57 R59

S58





Panel 4.C

Table with columns: gi, ref, protein names (e.g., FFPFHVVDDTH, HEDALTKTN), amino acid sequences, and UniProt IDs (e.g., SNNMVRVN, SNNMRI). The table lists protein entries and their corresponding UniProt identifiers.







Panel 4.F

|                                 |               |            |                 |        |       |         |         |       |     |           |   |   |             |     |
|---------------------------------|---------------|------------|-----------------|--------|-------|---------|---------|-------|-----|-----------|---|---|-------------|-----|
| gi 678203614 gb KFV70595.1      | LI P AGAEVLS  | HAEAAQRAA  | -- I I I VAVQR  | QHYSFL | ----- | LPLAEA  | LQGKVL  | ----- | VDI | SNLKI D   | - | Q | YPESNAQHLA  | 120 |
| gi 449492447 ref XP_002193727.2 | LI P KDAEVLG  | HAEAAQKAA  | -- I I I AI PR  | QHYNFL | ----- | TPLAEV  | LHGKVL  | ----- | VDI | SNLKL N   | - | Q | YPSNAEHLA   | 115 |
| gi 677488410 gb RFQ77815.1      | LI P KGAEVLG  | HAEAAQKAA  | -- I I I AI QR  | QHYNFL | ----- | TS LAEI | LHGKVL  | ----- | VDV | SNLKI N   | - | Q | YPESNAEYLA  | 122 |
| gi 551506445 ref XP_005804755.1 | PVP P GAQVMS  | HEVAAQAS   | -- LVFVCVQR     | EHYDFL | ----- | ETLAPQ  | LNGKVL  | ----- | VDV | SNLKK N   | - | M | YPEANA EYLQ | 126 |
| gi 676412338 gb RFQ56232.1      | LI P KDAEVLG  | HAEAAQKAA  | -- I I I AI QR  | QHYNFL | ----- | I PLAEI | LHGKVL  | ----- | VDI | SNLKL N   | - | Q | YPESNAEYLA  | 122 |
| gi 291190416 ref NP_001167369.1 | RLP HGAQVLG   | HAAAAQSAH  | -- LI FI AVQR   | EHYDFL | ----- | VPLANQ  | LKGKVL  | ----- | VDL | SNLRR N   | - | Q | YPEANA EYLQ | 132 |
| gi 669272195 ref XP_008628113.1 | LI P KDAEVLG  | HAEAAQKAA  | -- I I I AI QR  | QHYNFL | ----- | I PLAEI | LHGKVL  | ----- | VDI | SNLKL N   | - | Q | YPESNAEYLA  | 122 |
| gi 543346256 ref XP_005518838.1 | LI P KDAEVLG  | HAEAAQKAA  | -- I I I AVQR   | QHYNFL | ----- | I PLAEV | LRGKVL  | ----- | VDI | SNLKL N   | - | Q | YPESNAEYLA  | 122 |
| gi 542142451 ref XP_005480330.1 | LI P KDAEVLG  | HAEAAQKAA  | -- I I I AI QR  | QHYNFL | ----- | TPLAEV  | LRGKVL  | ----- | VDI | SNLKL N   | - | Q | YPESNAEHLA  | 122 |
| gi 327274760 ref XP_003222144.1 | LI P EGATI SS | HAEAAQMAN  | -- VI I I AI HR | GHYNFL | ----- | ESLGEV  | LHGKVL  | ----- | VDV | SNLKT N   | - | Q | YPESNAEYLA  | 121 |
| gi 513168239 ref XP_001235257.3 | LI P KDAEVLN  | HAEAAQKAA  | -- I I I AI QR  | QHYDFL | ----- | ASLEET  | LHGKVL  | ----- | VDI | SNLKI N   | - | Q | YPESNAKYLA  | 122 |
| gi 565316654 gb ETE68273.1      | LI P QGATI LS | HAEAAETS E | -- VI I VAVHR   | AHYSFL | ----- | GSLREI  | LNGKVL  | ----- | VDV | SNLKI N   | - | Q | YAESNAEYLA  | 124 |
| gi 683467094 gb RFZ61303.1      | LI P NDAEVLG  | HAEAAQKAA  | -- I I I AI QR  | QHYNFL | ----- | TPLAEI  | LHGKVL  | ----- | VDI | SNLKI N   | - | Q | YPESNAEYLA  | 122 |
| gi 683900635 ref XP_009084178.1 | LI P KDAEVLG  | HAEAAQKAA  | -- I I I AI QR  | QHYNFL | ----- | TPLAEV  | LRGKVL  | ----- | VDI | SNLKL N   | - | Q | YAESNAEHLA  | 122 |
| gi 505775871 ref XP_004602336.1 | LLP SGTELLS   | YSEAAQKS D | -- I I I AI HR  | EHYHFL | ----- | TELTEF  | LNGKI L | ----- | VDV | SNLVRT N  | - | Q | YAESNAEYLA  | 121 |
| gi 676275116 gb KFO29573.1      | QMP NGAEVLS   | YSEAAQKS D | -- I I I AI HR  | DHYNFF | ----- | I ELTEV | LHEKI L | ----- | VDV | SNLKI N   | - | Q | YPESNAEYLA  | 148 |
| gi 696975795 ref XP_009557372.1 | LI P KDAEVLG  | HTEAAQKAA  | -- I I I AI QR  | QHYNFL | ----- | TPLAEV  | LRGKVL  | ----- | VDV | SNLKI N   | - | Q | YPESNAEYLA  | 122 |
| gi 676586017 gb KFO74821.1      | LI P KDAEVLG  | HTEAAQKAA  | -- I I I AI QR  | QHYNFL | ----- | TPLAEV  | LRGKVL  | ----- | VDV | SNLKI N   | - | Q | YPESNAEYLA  | 122 |
| gi 679006701 gb RFW07166.1      | LI P KDAEVLG  | HAEAAQKAA  | -- I I I AI QR  | QHYNFL | ----- | TPLAEI  | LHGKVL  | ----- | VDV | SNLKI N   | - | Q | YPESNAEYLA  | 122 |
| gi 676813260 gb KFP09648.1      | LI P KDAEVLG  | HAEAAQKAA  | -- I I I AI QR  | QHYNFL | ----- | TPLAEI  | LQGKVL  | ----- | VDV | SNLKI N   | - | Q | YPESNAEYLA  | 122 |
| gi 697032879 ref XP_009578615.1 | LI P KDAEVLG  | HAEAAQKAA  | -- I I I AI QR  | QHYNFL | ----- | TPLAEI  | LHGKVL  | ----- | VDV | SNLKI N   | - | Q | YPESNAEYLA  | 174 |
| gi 354488334 ref XP_003506325.1 | LLP RGAEVLS   | YSEAAQKS D | -- I I I LAI HR | EHYDFL | ----- | TELVDP  | LNGKI L | ----- | VDV | SNLRR KI  | - | Q | YPESNAEYLA  | 122 |
| gi 507713563 ref XP_004647823.1 | LLP SGAEVLS   | YSEAAQKS D | -- I I FVAI HR  | DHYNFF | ----- | I DLTEV | LKGKI L | ----- | VDV | SNLKI N   | - | Q | YPESNAEHLA  | 122 |
| gi 524968279 ref XP_005084025.1 | LLP RGAEVLN   | YSEAAQKS D | -- I I I LAMHR  | EHYDCL | ----- | TELVDP  | LNGKI L | ----- | VDV | SNLRR KI  | - | Q | YPESNAEYLA  | 122 |
| gi 410905463 ref XP_003966211.1 | PVP QGAEVAS   | HAEAAKEAS  | -- LI FVCVHR    | EHYEFL | ----- | TTLTPH  | LKGKVL  | ----- | VDL | SNLKKG    | - | I | YPEANAAYLQ  | 101 |
| gi 548400752 ref XP_005738595.1 | PLP EGAQVMT   | HEESARS AK | -- MI FVCVHR    | EHYEFL | ----- | EKMAPQ  | LERKVL  | ----- | VDL | SNLKKD    | - | M | YMEANAVYLQ  | 122 |
| gi 498938966 ref XP_004541746.1 | PLP EGAQVMT   | HEESARS AK | -- MI FVCVHR    | EHYEFL | ----- | EKMAPQ  | LERKVL  | ----- | VDL | SNLKKD    | - | M | YMEANAVYLQ  | 122 |
| gi 675614756 ref XP_008936236.1 | LI P KDAEVLG  | HAEAAQKAA  | -- I I I ALQR   | QHYNFL | ----- | I PLAEV | LHGKVL  | ----- | VDV | SNLKI N   | - | Q | YPESNAEYLS  | 122 |
| gi 348578509 ref XP_003475025.1 | LLP SGAEVLS   | YSEAAQKS D | -- I I I VAI HR | DHYNFF | ----- | I DLTEV | LNGKI L | ----- | VDV | SNLKI N   | - | Q | YPESNAEYLA  | 122 |
| gi 548400757 ref XP_005738596.1 | PLP PGTQAMS   | HVAAAQARS  | -- LVFVCI HR    | ENYNFL | ----- | ETLAPQ  | LKGKVL  | ----- | VDV | SNLKK N   | - | M | YPEANA EYLQ | 126 |
| gi 554845425 ref XP_005937599.1 | PLP PGTQAMS   | HVAAAQARS  | -- LVFVCI HR    | ENYNFL | ----- | ETLAPQ  | LKGKVL  | ----- | VDV | SNLKK N   | - | M | YPEANA EYLQ | 126 |
| gi 584013191 ref XP_006801411.1 | PLP PGTQAMS   | HVAAAQARS  | -- LVFVCI HR    | ENYNFL | ----- | ETLAPQ  | LKGKVL  | ----- | VDV | SNLKK N   | - | M | YPEANA EYLQ | 126 |
| gi 498937702 ref XP_004541468.1 | PLP PGTQAMS   | HVAAAQARS  | -- LVFVCI HR    | ENYNFL | ----- | ETLAPQ  | LKGKVL  | ----- | VDV | SNLKK N   | - | M | YPEANA EYLQ | 126 |
| gi 664765458 ref XP_008540415.1 | LFP SAAQVTF   | QEEAVGSP E | -- VI FVAMFR    | EHYSSL | ----- | CSLSSQ  | LAGKI L | ----- | VDV | SNPTEQHLQ | - | - | HRESNAEYLA  | 170 |

D113 N116  
S115

Panel 5.A

Table with columns for ID, reference, sequence, and protein name. Includes entries like g1|9558759|ref|NP\_036581.1|KMKP R R N L - - E E D D - - - - - Y L H K D T - - - - - G E T S M L K R P V L L H L H Q T A H A - - - - - D E F D C P S E L - Q H T Q E L F P Q W H L P I K I A A 79.





Panel 5.D

Table with columns for ID, Reference, Abbreviation, and Page Number. The table lists numerous entries, many of which are truncated on the right side. The first few rows include IDs like 'gi|556769052|ref|XP\_005979736.1' and 'gi|50768587|ref|XP\_004711963.1'. The table ends with IDs like 'gi|548463578|ref|XP\_005679356.1' and 'gi|548463578|ref|XP\_005679356.1'.



Panel 5.F

|                                 |       |        |           |     |      |         |        |       |          |         |              |              |         |             |              |        |      |       |       |       |       |     |
|---------------------------------|-------|--------|-----------|-----|------|---------|--------|-------|----------|---------|--------------|--------------|---------|-------------|--------------|--------|------|-------|-------|-------|-------|-----|
| gi 678203614 gb KFV70595.1      | QLLPA | AAKVV- | - KAFNTV  | SAW | ALQ- | SGLTDA  | SRQVF  | VCGDD | MEAKRLV- | MD      | LVRALGLTPL   | DQGS         | LLAAARE | I ENYPLQLFP | SWRFPI       | LLSL   | 206  |       |       |       |       |     |
| gi 449492447 ref XP_002193727.2 | QLLPG | KVV-   | - KAFNTV  | SAW | ALQ- | SGLTDA  | SRQVF  | VCGDD | VEAKQMV- | MN      | I VRALGLTPL  | DKGS         | LLAAQE  | I ENYPLQLFP | MWKFPI       | FLSL   | 201  |       |       |       |       |     |
| gi 677488410 gb KFQ77815.1      | QLVPG | AAKVV- | - KALNTV  | SAW | ALQ- | SGLTDA  | SRQVF  | VCGDD | MEAKQMV- | MD      | I VRALGLTPL  | DQGS         | LLAAQE  | I ENYPLQLFP | MWKFPI       | LLSL   | 208  |       |       |       |       |     |
| gi 551506445 ref XP_005804755.1 | KLIPG | AHV-   | - KAFNTL  | SAW | ALQ- | NGPSDA  | NRQVY  | LCGNN | PEAKQAV- | AV      | I STKLGLTPV  | DRGS         | LSAARE  | LEDFPLQLFP  | EWRPL        | MLRTI  | 212  |       |       |       |       |     |
| gi 676412338 gb KFO56232.1      | QLLPG | RVV-   | - KAFNTL  | SAW | ALQ- | SGLTDA  | SRQVF  | VCGDD | VEAKQMV- | MN      | I VRALGLTPL  | DKGS         | LLAAQE  | I ENYPLQLFP | I WKFPI      | FLSL   | 208  |       |       |       |       |     |
| gi 291190416 ref NP_001167369.1 | SLVPG | AEEV-  | - KGFNTL  | SAW | SLQ- | NGPSDA  | NRQVY  | ICGES | AEAKQAV- | I A     | VATKLGFSAL   | DRGS         | ISVARE  | LEDFPLQLFP  | QWRPL        | PLRI   | 218  |       |       |       |       |     |
| gi 669272195 ref XP_008628113.1 | QLLPG | RVV-   | - KAFNTV  | SAW | ALQ- | SGLTDA  | SRQVF  | VCGDD | VEAKQMV- | MN      | I VRALGLTPL  | DKGS         | LLAAQE  | I ENYPLQLFP | I WKFPI      | FLSL   | 208  |       |       |       |       |     |
| gi 543346256 ref XP_005518838.1 | QLLPG | KVV-   | - KGFNTV  | SAW | ALQ- | SGLTDA  | SRQVF  | VCGDD | VEAKQMV- | MN      | I VRALGLTPL  | DKGS         | LLAAQE  | I ENYPLQLFP | MWKFPI       | FLSL   | 208  |       |       |       |       |     |
| gi 542142451 ref XP_005480330.1 | QLLPG | KVV-   | - KAFNTV  | SAW | ALQ- | SGLTDA  | SRQVF  | VCGDD | VAAKEMV- | MN      | I VRALGLTPL  | DKGS         | LLAAQE  | I ENYPLQLFP | MWKFPI       | FLSL   | 208  |       |       |       |       |     |
| gi 327274760 ref XP_003222144.1 | QLMPS | KVV-   | - KAFNTV  | SAW | ALQ- | SGGLDA  | SRQVF  | VCGDD | HKS      | KDKV-   | ME           | I VRSLGLTTPV | DKGS    | LLAATE      | I ENYPLRFLFP | MWKYPI | LLSL | 207   |       |       |       |     |
| gi 513168239 ref XP_001235257.3 | QLVPG | ARVV-  | - KAFNTV  | SAW | ALQ- | SGLTDA  | SRQVF  | VCGDD | TEAKQMV- | MD      | I I RALGLTPL | DQGS         | LLAAARE | I ENYPLQLFP | MWKI         | PI     | FLSL | 208   |       |       |       |     |
| gi 565316654 gb ETE68273.1      | QLLPG | KVV-   | - KAFNTV  | SAW | ALQ- | SGGLDA  | NRQVFI | CGDD  | RKAKE    | KV-     | I E          | I VRSLGLTPL  | DKGS    | LLASKE      | I ENYPLQLFP  | MWFPI  | YLSF | 210   |       |       |       |     |
| gi 683900635 ref XP_009084178.1 | QLLPG | KVV-   | - KAFNTV  | SAW | ALQ- | SGLTDA  | SRQVF  | VCGDD | MEAKQMV- | MD      | I VRALGLTPL  | DQGS         | LLAAQE  | I ENYPLQLFP | MWKFPI       | LLSL   | 208  |       |       |       |       |     |
| gi 683467094 gb KFZ61303.1      | QLLPG | KVV-   | - KAFNTV  | SAW | ALQ- | SGLTDA  | SRQVF  | VCGDD | VEAKQMV- | MN      | I VRALGLTPL  | DKGS         | LLAAQE  | I ENYPLQLFP | MWFPI        | MYLSL  | 208  |       |       |       |       |     |
| gi 505775871 ref XP_004602336.1 | QLVPG | VHV-   | - KAFNTI  | SAW | ALQ- | SGALDA  | SRQVF  | VCGDD | S        | KAKQRV- | I A          | I VSSLGLTPL  | DQGS    | PLKAAKE     | I ENYPLQLFP  | MWKFPI | YLSA | 207   |       |       |       |     |
| gi 676275116 gb KFO29573.1      | QLVPG | AHV-   | - KAFNTI  | SAW | ALQ- | SGALDA  | SRQVF  | VCGND | I        | KAKQRV- | MD           | I VRTLGLTPL  | DQGS    | LVAAKE      | I ENYPLQLFP  | MWFPI  | YLSA | 234   |       |       |       |     |
| gi 696975795 ref XP_009557372.1 | QLVPG | ARVV-  | - KAFNTV  | SAW | ALQ- | SGLTDA  | SRQVF  | VCGDD | MEAKQMV- | MD      | I VRALGLTPL  | DQGS         | LLAAQE  | I ENYPLQLFP | MWKFPI       | FLSL   | 208  |       |       |       |       |     |
| gi 676586017 gb KFO74821.1      | QLVPG | ARVV-  | - KAFNTV  | SAW | ALQ- | SGLTDA  | SRQVF  | VCGDD | MEAKQMV- | MD      | I VRALGLTPL  | DQGS         | LLAAQE  | I ENYPLQLFP | MWKFPI       | FLSL   | 208  |       |       |       |       |     |
| gi 679006701 gb KFW07166.1      | QLVPG | AHV-   | - KAFNTV  | SAW | ALQ- | SGLTDA  | SRQVF  | VCGDD | MGAKQMV- | MD      | I VRALGLTPL  | DQGS         | LLAAQE  | I ENYPLQLFP | MWKFPI       | LLSL   | 208  |       |       |       |       |     |
| gi 676813260 gb KFP09648.1      | QLVPG | AHV-   | - KAFNTV  | SAW | ALQ- | SGLTDA  | SRQVF  | VCGDD | MEAKQMV- | MD      | I ARALGLTPL  | DRGS         | LLAAQE  | I ENYPLQLFP | MWKFPI       | LLSL   | 208  |       |       |       |       |     |
| gi 697032879 ref XP_009578615.1 | QLVPG | AHV-   | - KAFNTV  | SAW | ALQ- | SGLTDA  | SRQVF  | VCGDD | MGAKQMV- | MD      | I VRALGLTPL  | DQGS         | LLAAQE  | I ENYPLQLFP | MWKFPI       | LLSL   | 260  |       |       |       |       |     |
| gi 354488334 ref XP_003506325.1 | QLVPG | AHV-   | - KAFNTI  | SAW | ALQ- | SGLTDA  | SRQVF  | VCGND | S        | KAKHRV- | MD           | I ARTLGLTPL  | DQGS    | LVAANE      | I ENYPLQLFP  | MWRLP  | FYLS | 208   |       |       |       |     |
| gi 507713563 ref XP_004647823.1 | QLVPG | AHV-   | - KAFNTV  | SAW | ALQ- | SGALDA  | SRQVF  | VCGND | T        | KAKHRV- | MD           | I VLTGLTPL   | DQGS    | LLAAKE      | I ENYPLQLFP  | MWRFPI | CLSA | 208   |       |       |       |     |
| gi 524968279 ref XP_005084025.1 | QLVPG | AHV-   | - KAFNTI  | SAW | ALQ- | SGLTDA  | SRQVF  | VCGND | S        | KAKHRV- | MD           | VARTLGLTPL   | DQGS    | LVAANE      | I ENYPLQLFP  | MWRLP  | FYLS | 208   |       |       |       |     |
| gi 410905463 ref XP_003966211.1 | RLVPG | ADV-   | - KGLNTLS | SAW | ALQ- | NGL- LA | GKQVY  | LCGNS | ANAKQAV- | SE      | MATKLGTLV    | DRGS         | LSAARE  | LEDFPLRFLFP | EWRPL        | LLVAA  | 186  |       |       |       |       |     |
| gi 548400752 ref XP_005738595.1 | RLVPG | AAVV-  | - KGLNTLS | TW  | ALQ- | NGL- LA | GRQVY  | LCGNN | GEAKRDV- | AE      | MATKLGTLV    | DKGS         | LSAAKE  | VEDFPLQLFP  | EWRMP        | LYVAF  | 207  |       |       |       |       |     |
| gi 498938966 ref XP_004541746.1 | QLLPG | ARVV-  | - KAFNTV  | SAW | ALQ- | SGLTDA  | SRQVF  | VCGDD | MEAKQMV- | MD      | I VRAVGLTPL  | DKGS         | LVAANE  | I ENYPLQLFP | MWKFPI       | FLSL   | 208  |       |       |       |       |     |
| gi 675614756 ref XP_008936236.1 | QLVPG | AHV-   | - KAFNTI  | SAW | ALQ- | SGALDA  | SRQVF  | VCGND | T        | NAKHRV- | MD           | I VRTLGLTPL  | DRGAL   | VAAKE       | I ENYPLQLFP  | MWRFPI | CLSA | 208   |       |       |       |     |
| gi 548400757 ref XP_005738596.1 | RLVPG | AHV-   | - KGFNTLS | SAW | ALQ- | NGPSDA  | NRQVY  | VCGNS | LEAKQAV- | I E     | VATKLGFTVL   | DRGS         | LTAARE  | LEDFPLQLFP  | EWRPL        | PLQAT  | 212  |       |       |       |       |     |
| gi 554854825 ref XP_005937599.1 | RLVPG | AHV-   | - KGFNTLS | SAW | ALQ- | NGPSDA  | NRQVY  | VCGNS | LEAKQAV- | I E     | VATKLGFTVL   | DRGS         | LTAARE  | LEDFPLQLFP  | EWRPL        | PLQAT  | 212  |       |       |       |       |     |
| gi 584013191 ref XP_006801411.1 | RLVPG | AHV-   | - KGFNTLS | SAW | ALQ- | NGPSDA  | NRQVY  | VCGNS | LEAKQAV- | I E     | VATKLGFTVL   | DRGS         | LTAARE  | LEDFPLQLFP  | EWRPL        | PLQAT  | 212  |       |       |       |       |     |
| gi 498937702 ref XP_004541468.1 | RLVPG | AHV-   | - KGFNTLS | SAW | ALQ- | NGPSDA  | NRQVY  | VCGNS | PEAKQAV- | I E     | VATKLGFTVL   | DRGS         | LTAARE  | LEDFPLQLFP  | EWRPL        | PLQAT  | 212  |       |       |       |       |     |
| gi 664765458 ref XP_008540415.1 | SLFPT | CSVV-  | - KAFNVI  | SAW | TLQ- | S       | SPR    | RDG   | NRQVPI   | CS      | DQ           | PEAKRTV-     | SE      | MVHAMGFTPV  | DMG          | LVS    | ARE  | VEAMP | LRLLP | GWKVP | ALLTL | 256 |

P138

S150

D191 G193

Panel 6.A

Table with 5 columns: ID, Ref, Description, Mutation, and Position. Contains a list of genetic variants with their corresponding reference sequences and positions.





Panel 6.C

Table with 4 columns: ID, Label, Content, and Page Number. The content is a dense list of alphanumeric strings, likely a codebook or data dictionary. The page number on the right side of each row varies, ranging from 309 to 326.

Panel 6.D

Table with 5 columns: ID, Reference, Text, and two column headers (likely GLLS and GLLS). The table contains 400 rows of data, including IDs such as gi|556769052 and various alphanumeric strings.



Panel 6.F

|                                 |             |                |               |                |               |              |          |     |            |             |     |
|---------------------------------|-------------|----------------|---------------|----------------|---------------|--------------|----------|-----|------------|-------------|-----|
| gi 678203614 gb KFV70595.1      | GLTI FFFLYC | LALDVI YPYV    | YQKKDLS - FL  | I AVSI PNEVC   | PVLALMLLGL    | VYVPGVLAAI   | LQLWRGT  | KYR | RFPDWLDRWM | LCKKQLGLVA  | 295 |
| gi 449492447 ref XP_002193727.2 | GLTAFYYYC   | VLLDI I YTYI   | YEKNDFS - FF  | I AI TI PNRVC  | PVMALI L LAL  | VYLPGI FAAI  | I QLYRGT | KYR | RFPDWLDRWM | LCKKQLGLI A | 290 |
| gi 677488410 gb KFQ77815.1      | GLTAFYYYC   | LI RDI I YPYV  | YENKDYS - FF  | I AI SI PNRI C | PI LALI L LAL | VYLPGLAAI    | I QLYRGT | KYR | RFPDWLDRWM | LCKKQLGLVA  | 297 |
| gi 551506445 ref XP_005804755.1 | GLTAFYYYL   | LTRDVI YAYV    | DEGRDI - FR   | I MMSLANKVF    | PSVSLI L LSL  | CYLPGVI AGF  | F QLYRGT | KYK | RFPDWLDRWM | LCKKQLGLI A | 301 |
| gi 676412338 gb KFO56232.1      | GLTAFYYYC   | LALDVI YTYI    | YERNNFS - FF  | I AI TI PNRVC  | PVMALI L LAL  | VYLPGI FAAI  | I QLYRGT | KYR | RFPDWLDRWM | LCKKQLGLI A | 297 |
| gi 291190416 ref NP_001167369.1 | GLSAAFFYYL  | LI RDI I YAYV  | TQGGDI - FR   | I MVSLANKVC    | PI VSLI M LSL | CYLPGLASF    | L QLYRGT | KYR | RFPDWLDRWM | LCKKQLGLLA  | 307 |
| gi 669272195 ref XP_008628113.1 | GLTAFYYYC   | LALDVI YTYI    | YERNNFS - FF  | I AI TI PNRVC  | PVMALI L LAL  | VYLPGI FAAI  | I QLYRGT | KYR | RFPDWLDRWM | LCKKQLGLI A | 297 |
| gi 543346256 ref XP_005518838.1 | GLTAFYYYC   | VALDI I YTYI   | YEKNNFS - FF  | I AI TI PNRVC  | PVMALI L LAL  | VYLPGI FAAI  | I QLYRGT | KYR | RFPDWLDRWM | LCKKQLGLI A | 297 |
| gi 542142451 ref XP_005480330.1 | GLSAPVLYS   | I I RDVVYNYV   | EKDKKYF - FF  | I AI SI PNRI C | PVVALVLLAL    | VYLPGI FAAI  | L QLYRGT | KYS | RFPDWLDRWM | LCKKQLGLVA  | 296 |
| gi 327274760 ref XP_003222144.1 | GLTAFYYYC   | LTRDVI YPYV    | YENKDYS - FF  | I AI SI PNRI C | PI I ALVLLAL  | VYLPGI LAAI  | I QLYRGT | KYS | RFPDWLDRWM | LCKKQLGLVA  | 297 |
| gi 513168239 ref XP_001235257.3 | ALSAFI FLYS | VVRDVI YNHV    | EKSKDYS - FF  | I VVTI ANRI C  | PVVALVLLAL    | VYLPGI FAAI  | L QLYRGT | KYS | RFPDWLDRWM | LCKKQLGLVA  | 299 |
| gi 565316654 gb ETE68273.1      | GLTAFYYYC   | LTLDI I YPYV   | YENKDFS - FF  | I AI SI PNRI C | PI LALI L LAL | VYLPGLAAI    | I QLYRGT | KYH | RFPDWLDRWM | LCKKQLGLVA  | 297 |
| gi 683900635 ref XP_009084178.1 | GLTAFYYYC   | VALDI I YTYI   | YEKNNFS - FF  | I AI TI PNRVC  | PVMALI L LAL  | VYLPGI FAAI  | I QLYRGT | KYH | RFPDWLDRWM | LCKKQLGLI S | 297 |
| gi 505775871 ref XP_004602336.1 | ALFI FFFHYC | VI RDI I YFYV  | SKKKDVT - FS  | LAYS I PSHVC   | PI VALI L LGL | VYLPGI I AAI | L QLYRGT | KYH | QFPNWLDRWM | LCKKQLGLI S | 296 |
| gi 676275116 gb KFO29573.1      | ALCI FFFHYC | I I RDI I YPYV | NKKEDNT - FR  | LAI SI PNRVF   | PI TALVLLAL   | VYLPGLS AI   | L QLYRGT | KYR | RFPDWLDRWM | LCKKQLGLVA  | 323 |
| gi 696975795 ref XP_009557372.1 | GLTAFYYYC   | LI RDVI YAYV   | YEKNDYS - FF  | I AI SI PNQI C | PI LALI L LAL | VYLPGLAAI    | L QLYRGT | KYR | RFPDWLDRWM | LCKKQLGLVA  | 297 |
| gi 676586017 gb KFO74821.1      | GLTAFYYYC   | LI RDVI YAYV   | YEKNDYS - FF  | I AI SI PNQI C | PI LALI L LAL | VYLPGLAAI    | L QLYRGT | KYR | RFPDWLDRWM | LCKKQLGLVA  | 297 |
| gi 679006701 gb KFW07166.1      | GLTAFYYYC   | LTRDVI YPYV    | YENKDFS - FF  | I VI SI PNRI C | PI LALI L LAL | VYFPGVLAAI   | I QLYRGT | KYL | RFPDWLDRWM | LCKKQLGLVA  | 297 |
| gi 676813260 gb KFP09648.1      | GLTTFFFFY   | LI REVI YAYV   | YENKDFS - FF  | I AI SI PNRI C | PV LALI L LAL | VYLPGLAAI    | I QLYRGT | KYR | RFPDWLDRWM | LCKKQLGLVA  | 297 |
| gi 697032879 ref XP_009578615.1 | GLTAFYYYC   | LTRDVI YPYV    | YENKDFS - FF  | I VI SI PNRI C | PI LALI L LAL | VYFPGVLAAI   | I QLYRGT | KYL | RFPDWLDRWM | LCKKQLGLVA  | 349 |
| gi 354488334 ref XP_003506325.1 | VLCAPFFVYC  | AI REVI YPYV   | NGKTDTT - FR  | LAI SI PNRVF   | PI TALVLLAL   | VYLPGLAAI    | L QLYRGT | KYR | RFPDWLDRWM | LCKKQLGLVA  | 297 |
| gi 507713563 ref XP_004647823.1 | ALCI FFFHYC | VI RDI I YPYV  | SKKQDNT - FR  | LAI SI PNRVF   | PI TALVLLAL   | VYLPGVI AAI  | L QLYRGT | KYH | RFPDWLDRWM | LCKKQLGLVA  | 297 |
| gi 524968279 ref XP_005084025.1 | VLCVFFVYV   | VI REVI YPYV   | NEKTDTT - FR  | LAI SI PNRVF   | PI TALVLLAL   | VYLPGLAAI    | L QLYRGT | KYR | RFPDWLDRWM | LCKKQLGLVA  | 297 |
| gi 410905463 ref XP_003966211.1 | CLMGFFYYL   | LI RDVI YAYV   | ETGQDI - YR   | I MI SLANKVF   | PI VSLVMLS L  | CYLPGCI AAF  | L QLYRGT | KYK | RFPDWLDRWM | LCKKQMLVA   | 275 |
| gi 548400752 ref XP_005738595.1 | GLAFFFLLYL  | VI RDI I YAYV  | ENEDI S - YR  | I MI SLANKI T  | PVVS LI M LSL | CYLPGAI AGF  | L QLYRGT | KYR | RFPDWLDRWM | LCKKQLGLLA  | 296 |
| gi 498938966 ref XP_004541746.1 | GLSAPVLYL   | LI RDI I YAYV  | ENEDI S - YR  | I MI SLANKI T  | PVVS LI M LSL | CYLPGAI AGF  | L QLYRGT | KYR | RFPDWLDRWM | LCKKQLGLLA  | 296 |
| gi 675614756 ref XP_008936236.1 | GLTAFYYYC   | LALDVI YPYV    | YQNKDFS - FF  | I VI SI PNRI C | PI LALI L LAL | VYLPGLAAI    | I QLYRGT | KYR | RFPDWLDRWM | LCKKQLGLVA  | 297 |
| gi 348578509 ref XP_003475025.1 | MLCI FFFHYC | VI RDI I YPYV  | YKKE DNT - FR | LAI SI PNRVF   | PI TALVLLAL   | VYLPGVI AAI  | L QLYRGT | KYF | RFPDWLDRWM | LCKKQLGLVA  | 297 |
| gi 548400757 ref XP_005738596.1 | GLTAFYYYL   | LI RDVI YS YV  | VNDKDI S - FR | I MASLANKVF    | PI VSLI M LSL | CYLPGVI AAF  | L QLYRGT | KYK | RFPDWLDRWM | LCKKQLGLVA  | 301 |
| gi 554854825 ref XP_005937599.1 | GLTAFYYYL   | LI RDVI YS YV  | VNDKDI S - FR | I MASLANKVF    | PI VSLI M LSL | CYLPGVI AAF  | L QLYRGT | KYK | RFPDWLDRWM | LCKKQLGLVA  | 301 |
| gi 584013191 ref XP_006801411.1 | GLTAFYYYL   | LI RDVI YS YV  | VNDKDI S - FR | I MASLANKVF    | PI VSLI M LSL | CYLPGVI AAF  | L QLYRGT | KYK | RFPDWLDRWM | LCKKQLGLVA  | 301 |
| gi 498937702 ref XP_004541468.1 | GLTAFYYYL   | LI RDVI YS YV  | VNDKDI S - FR | I MASLANKVF    | PI VSLI M LSL | CYLPGVI AAF  | L QLYRGT | KYK | RFPDWLDRWM | LCKKQLGLVA  | 301 |
| gi 664765458 ref XP_008540415.1 | GLLVFFAYN   | FVRDVLHPYL     | QE GKNKF - YK | LP VS VVNTTL   | PCVAYVLLSL    | VYLPGLAAA    | L QLRRTG | KYR | RFPDWLDRWM | QHRKQI GLLS | 345 |

Y229

Y271

Q281 K287

W298 K303

L295 R302













Panel 7.F

|                                 |                |                |                |                  |                |              |            |                |             |     |
|---------------------------------|----------------|----------------|----------------|------------------|----------------|--------------|------------|----------------|-------------|-----|
| gi 678203614 gb KFV70595.1      | LAFASVHVLV     | TLVTP I RS YV  | KWRASSQAVS     | QAL - - S - NTT  | Q - - PLNTTNA  | WLSDSYLALG   | ILGFFLVLL  | GI TSLPS - VS  | NSVNWREFRF  | 379 |
| gi 449492447 ref XP_002193727.2 | LAFASLHVLF     | TLVTP I RS FV  | RWRTSTR I S    | QVM - - N - NKT  | E - - PLDHTNA  | WLSDSYLALG   | ILGFFLVLL  | GI TSLPS - VS  | NNVNWREFRF  | 374 |
| gi 677488410 gb KFQ77815.1      | LAFASLHVLY     | TLVI P I RFFV  | RWRI SSR I I S | QAL - - N - NKT  | E - - PLNTSNA  | WLSDSYVALG   | ILGFFLVLL  | GI TSLPS - VS  | NNVNWREFRF  | 381 |
| gi 551506445 ref XP_005804755.1 | LALASLHVLY     | TLVI P I RYFV  | RFRLAGS T I S  | QI K - - S - NKT | S - - PFDTTMA  | WRTDSYYAI G  | ALGFGLYLL  | GI SSLPS - VS  | NALS WREFSF | 385 |
| gi 676412338 gb KFO56232.1      | LAFASLHVVF     | TLVTPMR AFV    | SWRTSKGI I S   | QVL - - N - NKT  | E - - PLSNTNA  | WLSDSYLALG   | ILGFFLVLL  | GI TSLPS - VS  | NNVNWREFRF  | 381 |
| gi 291190416 ref NP_001167369.1 | LGF AFL HVLY   | TLVI P I RYFV  | RFKVTER TVS    | VI R - - E - NRT | T - - EFDTTTA  | WRSDSYLSLG   | ILGFGLYLL  | GI TSLPS - VI  | NSLSWREFSF  | 391 |
| gi 669272195 ref XP_008628113.1 | LAFASLHVVF     | TLVTPMR AFV    | SWRTSKGI I S   | QVL - - N - NKT  | E - - PLSNTNA  | WLSDSYLALG   | ILGFFLVLL  | GI TSLPS - VS  | NNVNWREFRF  | 381 |
| gi 543346256 ref XP_005518838.1 | LAFASLHVVF     | TLVTPMR AFA    | SWRTSKGI I S   | QAL - - N - NKT  | E - - PLNNTNA  | WLSDSYLALG   | ILGFFLVLL  | GI TSLPS - VS  | NNVNWREFRF  | 381 |
| gi 542142451 ref XP_005480330.1 | LAFASLH AVF    | TLVTP LRAFA    | SWRTGKGI I S   | QAL - - N - NKT  | E - - PLDHTKA  | WLSDSYLALG   | ILGFFLVLL  | GI TSLPS - VS  | NNVNWREFRF  | 381 |
| gi 327274760 ref XP_003222144.1 | LAY AFL HVLY   | TLVI P I RYFV  | RWRI GS Y TLE  | QAL - - N - NRT  | N - - PLNTENA  | WLSDSYVALG   | ILGFFLVLL  | GI TSLPS - VS  | NSVNWREFRF  | 380 |
| gi 513168239 ref XP_001235257.3 | LAFASLHV I Y   | TLVI P I RYFV  | RWRI EDRT I S  | QAL - - N - NKT  | T - - PFDNTNG  | WLSDSYLALG   | ILGFLLVLL  | GI TSLPS - VS  | NNVNWREFRF  | 381 |
| gi 565316654 gb ETE68273.1      | LAY AFL HV I Y | TLVI P I RYFV  | RWRQNS YVLE    | QAL - - K - NKT  | D - - PFWGTGA  | WHSDSYLALG   | ILGFFLVLL  | GI TSLPS - VS  | NSVNWREFRF  | 383 |
| gi 683467094 gb KFZ61303.1      | LAFASLHVLY     | TLVI P I RS FV | RWRI SSS TVS   | QAL - - N - NKT  | E - - PLNNTYA  | WLSDSYLALG   | ILGFFLVLL  | GI TSLPS - VS  | NNVNWREFRF  | 381 |
| gi 683900635 ref XP_009084178.1 | LAFASLHVVL     | TLVSPRR AF T   | KWKTGKGI I S   | QVL - - N - NKT  | E - - PLDHTNA  | WLSDSYLALG   | ILGFFLVLL  | GI TSLPS - I S | NNVNWREFRF  | 381 |
| gi 505775871 ref XP_004602336.1 | LGL ACL HVLF   | I VSTPLRY I A  | LWHFKNMT I S   | QVA - - L - KKE  | S - - PI STYRA | WNSDSYLT LG  | VLGFFLVLL  | GI TSLPS - VS  | NLVNWREFRF  | 380 |
| gi 676275116 gb KFO29573.1      | LGF AFL HV I Y | TLVI P I RYFV  | RWRLRNI TAT    | QVI - - D - KKD  | D - - PFI TSTA | WLSDSYVSLG   | ILGFFLVLL  | GI TSLPS - VS  | NMVNWREFRF  | 407 |
| gi 696975795 ref XP_009557372.1 | LAFASLHVLY     | TLVI P I RS FV | RWRI SSS TVS   | QAL - - K - NAT  | Q - - PLNTTYA  | WLSDSYLALG   | ILGFFLVLL  | GI TSLPS - VS  | NNVNWREFRF  | 381 |
| gi 676586017 gb KFO74821.1      | LAFASLHVLY     | TLVI P I RS FV | RWRI SSS TVS   | QAL - - K - NAT  | Q - - PLNTTYA  | WLSDSYLALG   | ILGFFLVLL  | GI TSLPS - VS  | NNVNWREFRF  | 381 |
| gi 679006701 gb KFW07166.1      | LAFASLHVLY     | TLVI P I RFFV  | RWRI SSQ I I S | QAL - - N - NKT  | E - - PLNTTNA  | WLSDSYLALG   | ILGFFLVLL  | GI TSLPS - VS  | NNVNWREFRF  | 381 |
| gi 676813260 gb KFP09648.1      | LAFASLHVLY     | TLVI P I RS FV | RWRI SSR TI A  | LAL - - N - NKT  | E - - PLNTTNA  | WLSDSYLALG   | ILGFFLVLL  | GI TSLPS - VS  | NNVNWREFRF  | 381 |
| gi 697032879 ref XP_009578615.1 | LAFASLHVLY     | TLVI P I RFFV  | RWRI SSQ I I S | QAL - - N - NKT  | E - - PLNTTNA  | WLSDSYLALG   | ILGFFLVLL  | GI TSLPS - VS  | NNVNWREFRF  | 433 |
| gi 354488334 ref XP_003506325.1 | LGF AFL HV I Y | TLVI P I RYFV  | RWRLRNATVT     | QAL - - A - NKD  | N - - PFSSTA   | WNSDSYLALG   | ILGFFLVLL  | GI TSVPS - VS  | NMVNWREFRF  | 381 |
| gi 507713563 ref XP_004647823.1 | LGF AFL HV I Y | TLVI P I RYFV  | RWRLRNATVT     | QVI - - S - RKD  | D - - PFSSTA   | WYDSYMS LG   | VLGFFLVLL  | GI TSLPS - VS  | NMVNWREFRF  | 381 |
| gi 524968279 ref XP_005084025.1 | LGF AFL HV I Y | TLVI P I RYFV  | RWRLRNGT VT    | QAL - - A - NRD  | N - - PFSSTA   | WNSDSYLALG   | ILGFFLVLL  | GI TSLPS - VS  | NTVNWREFRF  | 381 |
| gi 410905463 ref XP_003966211.1 | LGL ALL HAI Y  | TLVI P I RYFV  | RHKL I SRVVD   | EM - - - KNNKT   | TPFYFDNKEA     | WGTDSFYVLG   | ILGFFLVLL  | GLTSLPS - VG   | GSLSWREFSF  | 361 |
| gi 548400752 ref XP_005738595.1 | LGF ALL HAI Y  | TLVI P I RYFV  | RQRVI SNVLN    | EV - - - KKNKT   | TPLYFDNTSA     | WRTDSLYALG   | ILGFFLVLL  | GLTSLPS - VG   | GTLWREFSF   | 382 |
| gi 498938966 ref XP_004541746.1 | LGF ALL HAI Y  | TLVI P I RYFV  | RQRVI SNVLN    | EV - - - KKNKT   | TPLYFDNTSA     | WRTDSLYALG   | ILGFFLVLL  | GLTSLPS - VG   | GTLWREFSF   | 382 |
| gi 675614756 ref XP_008936236.1 | LAFASVHVLV     | TLVI P I RS YV | RWRI SSHT I S  | QAL - - N - NKT  | E - - PLNTTNA  | WLSDSYVALG   | ILGFFLVLL  | GI TSLPS - VS  | NNVNWREFRF  | 381 |
| gi 348578509 ref XP_003475025.1 | LGF AFL HV I Y | TLVI P I RYFV  | RWRLRNI TVT    | QAI - - N - KKD  | D - - PFSI SLA | WLSDSYVSLG   | ILGFFLVLL  | GI TSLPS - VS  | NMVNWREFRF  | 381 |
| gi 548400757 ref XP_005738596.1 | LALASLHVLY     | TLVI P I RYFV  | RYRLAAHT I S   | QI K - - E - NKT | S - - PFDTTMA  | WRTDSYYV I G | ILGFGLYLL  | GI TSLPS - VS  | NVLSWREFSF  | 385 |
| gi 554854825 ref XP_005937599.1 | LALASLHVLY     | TLVI P I RYFV  | RYRLAAHT I S   | QI K - - E - NKT | S - - PFDTTMA  | WRTDSYYV I G | ILGFGLYLL  | GI TSLPS - VS  | NVLSWREFSF  | 385 |
| gi 584013191 ref XP_006801411.1 | LALASLHVLY     | TLVI P I RYFV  | RYRLAAHT I S   | QI K - - E - NKT | S - - PFDTTMA  | WRTDSYYV I G | ILGFGLYLL  | GI TSLPS - VS  | NVLSWREFSF  | 385 |
| gi 498937702 ref XP_004541468.1 | LALASLHVLY     | TLVI P I RYFV  | RYRLAAHT I S   | QI K - - E - NKT | S - - PFDTTMA  | WRTDSYYV I G | ILGFGLYLL  | GI TSLPS - VS  | NVLSWREFSF  | 385 |
| gi 664765458 ref XP_008540415.1 | FFCAALH ALY    | RGESE PAAAA    | VLVLLWLKDT     | KVL - - A - NKS  | H - - LWVEEV   | WRMEI YVSLG  | VLALGTLSLL | AVTSLPS - I A  | NSLNWREFSF  | 429 |

H316

W355

W388

E390

Panel 8.A

Table with columns for ID, Ref, Description, and other identifiers. The table is organized into two main columns, with a central header 'Panel 8.A' and column numbers 640, 660, 680, 700, 720 indicated at the top. The rows contain alphanumeric codes, reference numbers, and descriptive text, often including technical specifications or component names.

Panel 8.B

Table with 5 columns: ID, Reference, Key, Value, and Status. Rows include identifiers like 'g1|679184771', 'g1|694667236', and 'g1|677475561' paired with values like 'OS|KMGYAL|LLCT|V|HAL|VF' and 'AVL|VF'. The right side of the table lists various codes and status indicators such as 'PI|VLLCKC', 'PI|VLLCCK', and 'PI|VLLCCK'.









Panel 8.F

|                                 |     |          |          |     |            |            |           |       |         |         |         |         |       |       |     |     |     |
|---------------------------------|-----|----------|----------|-----|------------|------------|-----------|-------|---------|---------|---------|---------|-------|-------|-----|-----|-----|
| gi 678203614 gb KFV70595.1      | VQS | KLGYLTL  | VLCTAHTM | VY  | GGKWLFPSS  | YKWLPLPI   | YMLSLII   | ----- | PCAVLVI | KFVLI   | FPCLDKP | LTQIR   | -     | QGW   | 451 |     |     |
| gi 449492447 ref XP_002193727.2 | VQS | KLGYLTL  | ILSTAHTL | VY  | GGKWFLSPST | YKWLPLNI   | YLSLII    | ----- | PCSVL   | VVKFLLI | FPVCDKP | LTQIR   | -     | QGW   | 446 |     |     |
| gi 677488410 gb RFQ277815.1     | VQS | KLGYLTL  | ILCTAHTL | VY  | GGKQFLRPSS | YRWLPSAYM  | LSSLVV    | ----- | PCI     | VLVVKF  | VLI     | FPCLDKP | LTRI  | -     | QGW | 453 |     |
| gi 551506445 ref XP_005804755.1 | IQS | KLGYLTL  | FFCTFHTY | LY  | GWDRFLYISQ | YKWTTPPGYM | LCLVV     | ----- | PSLVL   | VFRL    | LLLLP   | CVDKS   | LSRI  | -     | QGW | 457 |     |
| gi 676412338 gb RF056232.1      | VQS | KLGYLAL  | ILCTAHTL | VY  | GGKWFLSPSA | YKWLPLNI   | YLSLIV    | ----- | PCAVL   | VVKF    | VLI     | FPVCDKP | LTQIR | -     | QGW | 453 |     |
| gi 291190416 ref NP_001167369.1 | VQS | KLGHLLTL | LLCTAHTY | LY  | GWNRFLSSST | YKWTTPPGYM | LCLVL     | ----- | PSVVL   | LLKL    | LLI     | THTHHT  | QNNTL | -     | RGW | 463 |     |
| gi 669272195 ref XP_008628113.1 | VQS | KLGYLAL  | ILCTAHTL | VY  | GGKWFLSPSA | YKWLPLNI   | YLSLIV    | ----- | PCAVL   | VVKF    | VLI     | FPVCDKP | LTQIR | -     | QGW | 453 |     |
| gi 543346256 ref XP_005518838.1 | VQS | KLGYLAL  | ILCTAHTL | VY  | GGKWFLSPSA | YKWLPLNI   | YLSLIV    | ----- | PCAVL   | VVKF    | VLI     | FPVCDKP | LTQIR | -     | QGW | 453 |     |
| gi 542142451 ref XP_005480330.1 | VQS | KLGYLAL  | ILCTAHTL | VY  | GGKWFLSPSA | YKWLPLNI   | YLSLIV    | ----- | PCAVL   | VVKF    | VLI     | FPVCDKP | LTQIR | -     | QGW | 453 |     |
| gi 327274760 ref XP_003222144.1 | VQS | YLGYLTL  | ILCTAHTL | VY  | GGKRFLRPSS | YPWGLPSI   | YFSLII    | ----- | PCI     | VLVMKF  | VLI     | LPCLDRP | LTQIR | -     | QGW | 452 |     |
| gi 513168239 ref XP_001235257.3 | VQS | KLGYLTL  | ILCTAHTL | VY  | GGKRFLSPSA | YRWLPLNAYM | LSLII     | ----- | PCI     | VLVVKF  | VLI     | LPCLDKQ | LTRI  | -     | QGW | 453 |     |
| gi 565316654 gb ETE68273.1      | VQS | YLGYLTL  | VLCTAHTL | GY  | GGKRFLYPHS | YPWFLPPVYL | LSLII     | ----- | PCI     | VLFI    | KFVLFV  | PCIDRP  | LTEIR | -     | QGW | 455 |     |
| gi 683467094 gb RFZ61303.1      | VQS | KLGYLTL  | VLCTAHTL | VY  | GGNRFLNPSS | YRWLPLNAYM | LSLIV     | ----- | PCI     | VLVVKF  | VLFV    | PCIDRP  | LTQIR | -     | QGW | 453 |     |
| gi 683900635 ref XP_009084178.1 | VQS | KLGYLAL  | ILCTAHTL | VY  | GGKWFLSPSA | YKWLPLNI   | YLSLIV    | ----- | PCAVL   | VVKF    | VLI     | FPVCDKP | LTQIR | -     | QGW | 453 |     |
| gi 505775871 ref XP_004602336.1 | VQS | KLGYLTL  | VLCTAHTL | VY  | GGKWFLSPSA | YKWLPLNI   | YLSLIV    | ----- | PCAVL   | VVKF    | VLI     | FPVCDKP | LTQIR | -     | QGW | 453 |     |
| gi 676275116 gb KFO29573.1      | VQS | KLGYLTL  | ILCTAHTL | VY  | GGKRFLSPAA | LRWYLPSTYL | IALTI     | ----- | PCT     | VLVI    | KCILI   | LPICDRT | LNRI  | -     | QGW | 452 |     |
| gi 696975795 ref XP_009557372.1 | VQS | KLGYLTL  | ILCTAHTL | VY  | GGKRFLSPAA | LRWYLPSTYL | IALTI     | ----- | PCT     | VLVI    | KCILI   | LPICDRT | LNRI  | -     | QGW | 452 |     |
| gi 676586017 gb KFO74821.1      | VQS | KLGYLTL  | ILCTAHTL | VY  | GGNRFLSPSS | YKWLPSAYM  | LSLIV     | ----- | PCI     | VLVVKF  | VLFV    | PCIDRP  | LTEIR | -     | QGW | 453 |     |
| gi 679006701 gb RFW07166.1      | VQS | KLGYLTL  | ILCTAHTL | VY  | GGKRFLSPSS | YKWLPSAYM  | LSLIV     | ----- | PCI     | VLVVKF  | VLFV    | PCIDRP  | LTEIR | -     | QGW | 453 |     |
| gi 676813260 gb KFP09648.1      | VQS | KLGYLTL  | ILCTAHTL | VY  | GGNRFLSPSS | YRWLPLNAYM | LALVV     | ----- | PCI     | VLVVKF  | VLFV    | PCIDRP  | LTEIR | -     | QGW | 453 |     |
| gi 697032879 ref XP_009578615.1 | VQS | KLGYLTL  | ILCTAHTL | VY  | GGKRFLSPSS | YRWLPLNAYM | LALVV     | ----- | PCI     | VLVVKF  | VLFV    | PCIDRP  | LTEIR | -     | QGW | 453 |     |
| gi 354488334 ref XP_003506325.1 | VQS | KLGYLTL  | VLCTAHTL | VY  | GGKRFLSPGI | LRWYLPSTYL | IALTI     | ----- | PCT     | VLVI    | KCILI   | LPICDRT | LNRI  | -     | QGW | 452 |     |
| gi 507713563 ref XP_004647823.1 | VQS | KLGLFTL  | ILCTAHTL | VAY | GGKFLPSPGI | LRWYLPSTYL | IALTI     | ----- | PCT     | VLVI    | KCILI   | LPICDRT | LNRI  | -     | QGW | 452 |     |
| gi 524968279 ref XP_005084025.1 | VQS | KLGYLTL  | VLCTAHTL | MY  | GGKRFLSPGI | LRWYLPSTYL | IALTI     | ----- | PCT     | VLVI    | KCILI   | LPICDRT | LNRI  | -     | QGW | 452 |     |
| gi 410905463 ref XP_003966211.1 | VQS | KLGHLLTL | SICTAHGY | IY  | GWNRFLRPST | YKWTTPPGYM | LCLIV     | ----- | PSVVL   | VLKI    | LLLLP   | CVDRA   | LTRI  | -     | QGW | 433 |     |
| gi 548400752 ref XP_005738595.1 | VQS | TLGYLTL  | FLSTAHCY | IY  | AWDKFLRKS  | YKWTTPPDSM | LCLIV     | ----- | PSVTL   | VLKL    | VLLP    | CVNRP   | LMRI  | -     | QGW | 454 |     |
| gi 498938966 ref XP_004541746.1 | VQS | TLGYLTL  | FLSTAHCY | IY  | AWDKFLRKS  | YKWTTPPDSM | LCLIV     | ----- | PSVTL   | VLKL    | VLLP    | CVNRP   | LMRI  | -     | QGW | 454 |     |
| gi 675614756 ref XP_008936236.1 | VQS | KLGYLTL  | ILCTAHTL | VY  | GGKWFLNLSL | YKWLPHAYM  | LSLIV     | ----- | PCI     | VLVI    | KFVLI   | FPCLDKP | LTQIR | -     | QGW | 453 |     |
| gi 348578509 ref XP_003475025.1 | VQS | KLGYLTL  | TLCTAHTL | VY  | GGKRFLTPSA | LRWYLPSTYL | IALTI     | ----- | PCT     | VLVVKF  | VLI     | MPICDRT | LTRI  | -     | QGW | 453 |     |
| gi 548400757 ref XP_005738596.1 | IQS | KLGYLTL  | FFCTFHTY | LY  | GWDFLQPS   | YKWFMLPGYM | LSLVV     | ----- | PSVVL   | VLKL    | LLLLP   | CVDS    | T     | LTRI  | -   | QGW | 457 |
| gi 554854825 ref XP_005937599.1 | IQS | KLGYLTL  | FFCTFHTY | LY  | GWDFLQPS   | YKWFMLPGYM | LSLVV     | ----- | PSVVL   | VLKL    | LLLLP   | CVDS    | T     | LTRI  | -   | QGW | 457 |
| gi 584013191 ref XP_006801411.1 | IQS | KLGYLTL  | FFCTFHTY | LY  | GWDFLQPS   | YKWFMLPGYM | LSLVV     | ----- | PSVVL   | VLKL    | LLLLP   | CVDS    | T     | LTRI  | -   | QGW | 457 |
| gi 498937702 ref XP_004541468.1 | IQS | KLGYLTL  | FFCTFHTY | LY  | GWDFLQPS   | YKWFMLPGYM | LSLVV     | ----- | PSVVL   | VLKL    | LLLLP   | CVDS    | T     | LTRI  | -   | QGW | 457 |
| gi 664765458 ref XP_008540415.1 | VQS | TLGFVAL  | VLSTLHTL | TY  | GWTRAFEE   | SR         | YKFLPPTFT | LTLV  | -----   | PCVVI   | LARG    | LFLLP   | CVSRR | LSKIR | -   | RGW | 501 |

Q395

H409

P439





Panel 9.C

|                                       |                |                 |                                             |                 |     |
|---------------------------------------|----------------|-----------------|---------------------------------------------|-----------------|-----|
| gi 126341326 ref XP_001368664.1       | EKS QFLEV - A  | S               | GI - I P H L S                              | PERVTVM         | 489 |
| gi 532098193 ref XP_005334744.1       | EKS QFLEEGT    | G               | GT - I P H L S                              | PERVTVM         | 490 |
| gi 617633979 ref XP_007530281.1       | EKS QFLEEGM    | R               | - A - V P H L S                             | PERVTVM         | 489 |
| gi 556762769 ref XP_005976677.1       | EKS QFLEEGI    | G               | GA - V P H L S                              | PERVTVM         | 490 |
| gi 118150810 ref NP_001071315.1       | EKS QFLEEGI    | G               | GA - V P H L S                              | PERVTVM         | 490 |
| gi 426227824 ref XP_004008015.1       | EKS QFLEEGI    | G               | GA - V P H L S                              | PERVTVM         | 490 |
| gi 560936067 ref XP_006193853.1       | EKS QFLEEGI    | G               | GA - V P H L S                              | PERVTVM         | 490 |
| gi 558107932 ref XP_006084994.1       | EKS QFPEEGV    | G               | GA - V P H F S                              | PERVTVM         | 490 |
| gi 678117095 gb KFU92571.1            | EKS HGI - EEA  | S               | GS - V P H L S                              | PERI T V M      | 489 |
| gi 698447595 ref XP_009700180.1       | EKS HVI - EEA  | S               | GS - V P H L S                              | PERI T V M      | 489 |
| gi 594104639 ref XP_006081037.1       | EKS QFLEEGI    | G               | GA - V P H L L                              | PERVTVM         | 502 |
| gi 585167019 ref XP_006735607.1       | EKS QFLEEGI    | G               | GA - V P H L S                              | PERVTVM         | 490 |
| gi 521032109 gb EPQ13895.1            | EKS QFPEEGV    | G               | GA - V P H F S                              | PERVTVM         | 587 |
| gi 594697418 ref XP_007195868.1       | EKS QFLEEGI    | G               | GA - V P H L S                              | PERVTVM         | 490 |
| gi 478514258 ref XP_004431380.1       | EKS QFLEEGI    | G               | GG - V P H L S                              | PERVTVM         | 490 |
| gi 586450893 ref XP_006834377.1       | EKNQFLEEGI     | G               | GA - I P H L S                              | PERVTVM         | 490 |
| gi 634845392 ref XP_007938025.1       | EKS QFLEEGI    | G               | GA - I P H L S                              | PERVTVM         | 490 |
| gi 675606498 ref XP_008947094.1       | EKS HVT - EEA  | S               | GS - V P H L S                              | PERI T V M      | 489 |
| gi 593759238 ref XP_007118374.1       | EKS QFLEEGI    | G               | GA - V P H L S                              | PERVTVM         | 490 |
| gi 697818105 ref XP_009639962.1       | EKS HVI - EEA  | S               | GS - V P H L S                              | PERI T V M      | 489 |
| gi 667308740 ref XP_008583827.1       | EKS QFLEEGI    | G               | GT - I P H L S                              | PERVTVM         | 490 |
| gi 602733454 ref XP_007452112.1       | EKS QFLEEGI    | G               | GA - V P H L S                              | PERVTVM         | 490 |
| gi 678002015 ref XP_009077875.1       | EKRHV - I EEI  | S               | GS - V P H L S                              | PERI T I M      | 489 |
| gi 557265001 ref XP_006017953.1       | EKGRYVKFT      | LPS ATG         | - E F S S G E T S S N V                     | 488             |     |
| gi 564242436 ref XP_006278018.1       | EKGRYVKFT      | LPS ATG         | - E F S S G E T S S N V                     | 488             |     |
| gi 591381643 ref XP_007065357.1       | EKS QVMEEG     | G               | GT - V P H L S                              | PERI T V M      | 489 |
| gi 470653227 ref XP_004329513.1       | EKS QFLEEGI    | G               | GA - V P H L S                              | PERVTVM         | 490 |
| gi 573893198 ref XP_006634352.1       | ENS - - - QYK  | - EETM          | GS - A T H V S                              | PERVTI M        | 490 |
| gi 676581571 gb KFO71606.1            | EKGRYVKFI      | LPS ATG         | - E Y S S G E T S S N V                     | 459             |     |
| gi 465984730 ref XP_004265673.1       | EKS QFLEEGI    | G               | GA - V P H L S                              | PERVTVM         | 490 |
| gi 530577007 ref XP_005282464.1       | EKS QVMEEG     | G               | GT - I P H L S                              | PERI T V M      | 489 |
| gi 676724330 gb KFO91432.1            | EKS HV - I EEA | S               | GS - V P H L S                              | PERI T V M      | 489 |
| gi 696963642 ref XP_009569809.1       | EKGRYVKFI      | LPS ATG         | - E Y S S G E T S S N V                     | 488             |     |
| gi 59773387 ref XP_007250435.1        | ESS - - - QRY  | - SDHE          | RP - A A H V S                              | PERVTI M        | 492 |
| gi 532008995 ref XP_005348316.1       | EKDGAVKFM      | LPADH           | - - MQG E K T S H V                         | 488             |     |
| gi 512848845 ref XP_004915480.1       | EKS HF KENTS   | G               | GS - A A H V S                              | PERVTVM         | 488 |
| gi 530566743 ref XP_005279909.1       | EKGRYVKFT      | LPS ATG         | - E Y S S G E S S S N V                     | 494             |     |
| gi 677540716 gb KFR02250.1            | EKGRYVKFV      | LPS AAG         | - E Y S S G E T S S N V                     | 459             |     |
| gi 542158470 ref XP_005487985.1       | EKGRYVKFV      | LPS ATG         | - E F S S G E T S S N V                     | 489             |     |
| gi 694847613 ref XP_009464896.1       | EKS HVVI EAA   | S               | GS - V P H L S                              | PERI T V M      | 490 |
| gi 678182455 gb KFV50177.1            | EKGRYVKFV      | LPS ATG         | - D Y S S G E T S S N V                     | 455             |     |
| gi 679011487 gb KFW09927.1            | EKGRYVKFV      | LPS ATG         | - E Y A S G E T S S N V                     | 459             |     |
| gi 669287235 ref XP_008636445.1       | EKGRYVKFV      | LPS TTG         | - E F S S G E T S S N V                     | 483             |     |
| gi 677406991 gb KFO17415.1            | EKGRYVKFI      | LPS PTG         | - E F S S G E T S S N V                     | 459             |     |
| gi 679204949 gb KFW09615.1            | EKGRYVKFV      | LPS TTS         | - G - - - E T S S N V                       | 455             |     |
| gi 676419860 gb KFO62638.1            | EKGRYVKFV      | LPS TTG         | - E F S S G E T S S N V                     | 459             |     |
| gi 675608719 ref XP_008948321.1       | EKGRYVKFI      | LPS PTG         | - E F S S G E T S S N V                     | 487             |     |
| gi 695149311 ref XP_009502251.1       | EKGRYVKFV      | LPS TTS         | - G - - - E T S S N V                       | 484             |     |
| gi 657741051 ref XP_008305597.1       | DSS - - - LYQF | RRLEPV          | - - - GL - A A H V S                        | PVKVTI M        | 516 |
| gi 676250196 gb KFO14068.1            | EKGRYVKFV      | LPS ATG         | - E Y S S G E T S S N V                     | 459             |     |
| gi 677275314 gb KFP66632.1            | EKGRYVKFV      | LPS TTG         | - E Y S S G E T S S N V                     | 459             |     |
| gi 683470305 gb KF264514.1            | EKGRYVKFV      | LPS ATG         | - E Y S S G E T S S N V                     | 459             |     |
| gi 677495685 gb KFO85090.1            | EKGRYVKFV      | LPS ATG         | - E Y S S G E T S S N V                     | 459             |     |
| gi 678215546 gb KFV82525.1            | EKGRYVKFV      | LPS ATG         | - E Y S S G E T S S N V                     | 459             |     |
| gi 679012261 gb KFW10387.1            | EKGRYVKFV      | LPS ATG         | - E Y S S G E T S S N V                     | 459             |     |
| gi 678203332 gb KFV70313.1            | EKGRYVKFV      | LPS ATG         | - E F S S G E T S S N V                     | 459             |     |
| gi 677360974 gb KFP92909.1            | EKGRYVKFV      | LPS ATG         | - E Y S S G E T S S N V                     | 459             |     |
| gi 591364413 ref XP_007057107.1       | EKGRYVKFT      | LPS ATG         | - E Y S S G E S S S N V                     | 488             |     |
| gi 642059449 emb CDQ90921.1           | ESS - - - QLR  | - QDPV          | - - - GA - A A H V S                        | PERVTI M        | 508 |
| gi 514790431 ref XP_005029984.1       | EKGRYVKFV      | LPS ATG         | - E Y S S G E T S S H V                     | 464             |     |
| gi 697039297 ref XP_009582166.1       | EKGRYVKFV      | LPS ATG         | - E Y S S G E T S S N V                     | 488             |     |
| gi 683466853 gb KF261062.1            | EKGRYVKFV      | LPS ATG         | - E Y S S G E T S S N V                     | 459             |     |
| gi 445990260 gb EMP38328.1            | EKGS CGPTQT    | MPHI VE         | - E R L L T R V S G G L E E L H P A T E D A | - I T W L D D   | 505 |
| gi 449279972 gb EMC87394.1            | EKGRYVKFV      | LPS TTE         | - E Y S S G E T S S N V                     | 459             |     |
| gi 683905829 ref XP_009086054.1       | EKGRYVKFV      | LPS ATG         | - E F S S G E T S S N V                     | 489             |     |
| gi 189537018 ref XP_001921185.1       | DSH - - - QSR  | - TNHE          | RP - A A H V S                              | PERVTI M        | 492 |
| gi 677528574 gb KFO91682.1            | EKGRYVKFV      | LPS TTG         | - E Y S S G E T S S N V                     | 459             |     |
| gi 54220465 ref XP_003440973.2        | EKS RHI RFI L  | - - - PDDDCR    | NG - L E N V S N V                          | 542             |     |
| gi 505775464 ref XP_004602222.1       | EKS QFLEEGN    | R               | GT - V P H L S                              | PERVTVM         | 490 |
| gi 543728167 ref XP_005505171.1       | EKGRYVKFV      | LPS TTE         | - E Y S S G E T S S N V                     | 488             |     |
| gi 694832483 ref XP_009470120.1       | EKGRYVKFV      | LPS TTG         | - E Y S S G E T S S N V                     | 488             |     |
| gi 121717655 ref NP_579848.1          | ERDGAVKFM      | LPAGH           | - - - T Q G E K T S H V                     | 488             |     |
| gi 543348556 ref XP_005519686.1       | EKGRYVKFV      | LPS TTG         | - E F S S G E T S S N V                     | 483             |     |
| gi 529422017 ref XP_005230862.1       | EKGRYVKFV      | LPS ATG         | - E Y S S G E T S S N V                     | 488             |     |
| gi 678127582 gb KFU96770.1            | EKGRYVKFV      | LPS ATG         | - E Y S S G E T S S N V                     | 459             |     |
| gi 675307570 gb KFM02832.1            | EKGRYVKFV      | LPS ATG         | - E Y S S G E T S S N V                     | 459             |     |
| gi 551522965 ref XP_005812970.1       | ERNRHI RFML    | - - - PAEDCR    | NE - V E D V S N V                          | 490             |     |
| gi 677996453 ref XP_009076494.1       | EKGRYVKFV      | LPS ATG         | - E Y S S W E T S S N V                     | 488             |     |
| gi 449507517 ref XP_002193303.2       | EKGRYVKFV      | LPS ATG         | - E F S S G E T S S N V                     | 483             |     |
| gi 686589478 ref XP_009289253.1       | EKGRYVKFV      | LPS ATG         | - E Y S S G E T S S N V                     | 488             |     |
| gi 641705622 ref XP_008141672.1       | EKDS AVKFM     | LPMDH           | - - - A L G Q K T S H L                     | 488             |     |
| gi 67811918 gb KFO88398.1             | EKGRYVKFV      | LPS ATG         | - E Y S S G E T S S N V                     | 461             |     |
| gi 657587052 ref XP_008297799.1       | DNM - - - QYRC | QRLEPV          | - - - GS - A A H S                          | PERVTI M        | 514 |
| gi 525004174 ref XP_005049782.1       | EKGRYVKFV      | LPS ATG         | - E F S S G E T S S N V                     | 573             |     |
| gi 326923015 ref XP_003207737.1       | EKGRYVKFV      | LPS ATG         | - E Y S S G E T S S N V                     | 483             |     |
| gi 548407520 ref XP_005739903.1       | EKS RHI RFI L  | - - - PDDDCR    | NG - L E N V S N V                          | 489             |     |
| gi 498991970 ref XP_004552642.1       | EKS RHI RFI L  | - - - PDDDCR    | NG - L E N V S N V                          | 489             |     |
| gi 556961687 ref XP_005991123.1       | EKGQRWCSFP     | - - - GQNQYS DA | PA - S Q N T S M L                          | 488             |     |
| gi 679141247 gb KFW69266.1            | EKGRYVKFV      | LPS ATG         | - E Y S S G E T S S N V                     | 459             |     |
| gi 602637514 ref XP_007425602.1       | ERS RYVNF      | LP RAS G        | - E F S S G E S S S T V                     | 488             |     |
| gi 181900480 asp Q8C159.1 STEA3_MOUSE | EKDGAVKFM      | LP GDH          | - - - T Q G E K T S H V                     | 488             |     |
| gi 637354672 ref XP_008118990.1       | ERGRYVKFT      | LP RAS G        | - E F S S G E S S S I V                     | 488             |     |
| gi 658907460 ref XP_008436460.1       | DTS - - - PCKA | RRLEPV          | - - - GS - A A N I S                        | PERVTI M        | 509 |
| gi 478499252 ref XP_004423952.1       | EKDGAVKFT      | LPMDH           | - - - A L A Q K T S H V                     | 488             |     |
| gi 554847391 ref XP_005934004.1       | EKS RHI RFI L  | - - - PDDDCR    | NG - L E N I D A R                          | RCSI QASE - MHV | 500 |
| gi 617482021 ref XP_007576620.1       | DTS - - - PCKA | RRLEPV          | - - - GS - A A N I S                        | PERVTI M        | 509 |
| gi 499043063 ref XP_004572136.1       | DSS - - - EMRG | KRMEPV          | - - - GS - A A H V S                        | PERVTVM         | 511 |
| gi 677457755 gb KFO47169.1            | EKGRYVKFV      | LPS ATG         | - E Y S S G E T S S N V                     | 459             |     |
| gi 548538803 ref XP_005752751.1       | DSS - - - EMRG | KRMEPV          | - - - GS - A A H V S                        | PERVTVM         | 511 |
| gi 690451678 ref XP_009325389.1       | EKGRYVKFV      | LPS ATG         | - E Y S S G E T S S N V                     | 488             |     |
| gi 527271964 ref XP_005153835.1       | EKGRYVKFV      | LPS ATG         | - E Y S S K E N S S N V                     | 488             |     |
| gi 554858454 ref XP_005939371.1       | DSS - - - EMRG | KRMEPV          | - - - GS - A A H V S                        | PERVTI M        | 511 |
| gi 584021062 ref XP_006805209.1       | DSS - - - EMRG | KRMEPV          | - - - GS - A A H V S                        | PERVTI M        | 511 |
| gi 348540180 ref XP_003457566.1       | DSS - - - EMRG | KRMEPV          | - - - GS - A A H I S                        | PERVTI M        | 512 |
| gi 676775583 gb KFP03399.1            | EKGRYVKFV      | LPS ATG         | - E Y S S G E T S S N V                     | 459             |     |
| gi 146134446 ref NP_573449.2          | EKDGAVKFM      | LP GDH          | - - - T Q G E K T S H V                     | 488             |     |
| gi 560947457 ref XP_006196306.1       | EKDGAI NFT     | RPVDH           | - - - A L A Q K T S H V                     | 502             |     |
| gi 663271948 ref XP_008495247.1       | EKGRYVKFV      | LPS ATG         | - E Y S S G E T S S N V                     | 488             |     |
| gi 504154911 ref XP_004589401.1       | ERGS AVRFM     | MPTDP           | - - - A L V E K T S H V                     | 488             |     |
| gi 678138311 gb KFOV07483.1           | EKGRYVKFV      | LPS ATG         | - E Y S S G E T S S N V                     | 459             |     |
| gi 655827020 ref XP_008256700.1       | EKGS AL KFT    | PTPTDN          | - - - A P V E K T S H V                     | 526             |     |
| gi 558227294 ref XP_006137688.1       | EKGRYVKFT      | LPAATG          | - - - E Y S S G E S C S N V                 | 488             |     |
| gi 488558203 ref XP_004469496.1       | ESE GALRGV     | PAAARG          | - - - A L A E K T S H V                     | 526             |     |
| gi 584001444 ref XP_006795762.1       | EKS RHI RFI L  | - - - PDDDCR    | NG - L E N V S N V                          | 489             |     |
| gi 194222160 ref XP_001488330.2       | EKDGAI KFT     | LPMDH           | - - - T L A Q K T S H V                     | 484             |     |

Panel 9.D

|                                           |                |             |               |            |     |
|-------------------------------------------|----------------|-------------|---------------|------------|-----|
| gi 556769052 ref XP_005979736.1           | EKDGS VRFT     | LPVDH       | ALAQKTS HV    | 554        |     |
| gi 507686587 ref XP_004711963.1           | EKD TI QFV     | LPADH       | TQAQKTS QV    | 487        |     |
| gi 335302527 ref XP_003359484.1           | EKEGAI KFT     | LPGDH       | ALAQKTS HV    | 526        |     |
| gi 524932352 ref XP_005070358.1           | EKDS AVKFL     | LP AEH      | TQREKTS HV    | 525        |     |
| gi 117646612 emb CAL37421.1               | ERES TI KFT    | LPTGH       | ALAEKTS HV    | 488        |     |
| gi 440900774 gb ELR51839.1                | EKDDGVRFT      | LPVDH       | ALAQKTS HV    | 492        |     |
| gi 156549145 ref NP_878919.2              | ERES TI KFT    | LPTDH       | ALAEKTS HV    | 498        |     |
| gi 528900695 ref XP_580320.4              | EKDGS VRFT     | LPVDH       | ALAQKTS HV    | 521        |     |
| gi 594066504 ref XP_006057222.1           | EKDGS VRFT     | LPVDH       | ALAQKTS HV    | 521        |     |
| gi 402892086 ref XP_003909253.1           | ERDGA I KFT    | LPTDH       | ALAEKTS HV    | 488        |     |
| gi 297668475 ref XP_002812462.1           | ERDGA I KFT    | LPTDH       | ALAEKTS HV    | 498        |     |
| gi 544474563 ref XP_005573007.1           | ERDGA I KFT    | LPTDH       | ALAEKTS HV    | 488        |     |
| gi 296490495 tpg DAA32608.1               | EKDDG VRFT     | LPVDH       | ALAQKTS HV    | 541        |     |
| gi 602688388 ref XP_007456415.1           | EKDDG VRFT     | LPVDC       | ALAQKTS HV    | 524        |     |
| gi 635057451 ref XP_007962925.1           | ERDGA I KFT    | LPTDH       | ALAEKTS HV    | 488        |     |
| gi 114580636 ref XP_515757.2              | ERDGTI KFT     | LPTDH       | ALAEKTS HV    | 498        |     |
| gi 47208402 emb CAG12826.1                | EKTRHI RFTL    | PEDDGCH     | NG LEDI SHV   | 491        |     |
| gi 332265514 ref XP_003281765.1           | ERDGA I RFT    | LPTDH       | SLAEKTS HV    | 498        |     |
| gi 355751640 gb EHH55895.1                | ERDGA I KFT    | LPTDH       | ALAEKTS HV    | 498        |     |
| gi 355566041 gb EHH22470.1                | ERDGA I KFT    | LPTDH       | ALAEKTS HV    | 498        |     |
| gi 507625590 ref XP_004626461.1           | EKDDGVRKFM     | LPVDS       | VLAEKTS HV    | 583        |     |
| gi 426336960 ref XP_004031719.1           | ERDGTI KFT     | LPTDH       | ALAEKTS HV    | 488        |     |
| gi 466042113 ref XP_004276550.1           | EKDDGVRKFM     | LPVDC       | ALAQKTS HV    | 484        |     |
| gi 348586053 ref XP_003478785.1           | EKDS AVKFM     | LPNDS       | ILTEKTS HV    | 498        |     |
| gi 678203611 gb KFV70592.1                | EKDDG VRFT     | LPVDH       | TLAQKTS HV    | 448        |     |
| gi 548454266 ref XP_005676308.1           | EKDDG VRFT     | LPVDH       | TLAQKTS HV    | 521        |     |
| gi 403257231 ref XP_003921232.1           | EKDDG VRFT     | LPVDH       | TLAQKTS HV    | 454        |     |
| gi 584050028 ref XP_006769725.1           | EKDS AVKFT     | LPGDH       | ALGQKTS HL    | 484        |     |
| gi 466042108 ref XP_004276549.1           | EKDDGVRKFM     | LPVDC       | ALAQKTS HV    | 524        |     |
| gi 589936480 ref XP_006981008.1           | EKDRAVKFM      | LTADH       | TQGEKTS HV    | 526        |     |
| gi 470636779 ref XP_004323715.1           | EKDDGVRKFM     | LPVDC       | ALAQKTS HV    | 524        |     |
| gi 617610093 ref XP_007524819.1           | EKDDGVRKFM     | LPAS Q      | ALAQKTS HV    | 488        |     |
| gi 345784138 ref XP_541005.3              | EKDDG VRFT     | LPMDH       | ALAQKTS HV    | 488        |     |
| gi 558170211 ref XP_006098885.1           | EKDS AVKFT     | LPVDH       | ALGQKTS HL    | 484        |     |
| gi 426356824 ref XP_004045753.1           | EKDDG VRFT     | LPVDC       | ALAQKTS HV    | 454        |     |
| gi 573897177 ref XP_006636326.1           | ERGQI RFRL     | PEDG        | AA LEDVSNV    | 484        |     |
| gi 635114983 ref XP_007980440.1           | EKDDG VRFT     | LPVDC       | ALAQKTS HV    | 452        |     |
| gi 545532013 ref XP_005631969.1           | EKDDG VRFT     | LPVDC       | ALAQKTS HV    | 522        |     |
| gi 555980326 ref XP_005902090.1           | EKDDG VRFT     | LPVDC       | ALAQKTS HV    | 627        |     |
| gi 554564434 ref XP_005876534.1           | EKDS TVKFT     | LPVDH       | ALGQKTS HL    | 517        |     |
| gi 677471114 gb KFO60528.1                | EKGRYVKFV      | LPSATG      | E YSSGETS SNV | 459        |     |
| gi 625234438 ref XP_007608377.1           | EKDDGVRKFM     | LPADH       | RQGEKTS HV    | 503        |     |
| gi 594631581 ref XP_007169320.1           | EKDDGVRKFM     | LPVDR       | ALAQKTS HV    | 524        |     |
| gi 444513159 gb ELV10282.1                | EKDDGVRKFM     | LPVDH       | VLAEKTS HV    | 488        |     |
| gi 617416661 ref XP_007557133.1           | ERNRHI RFML    | PAEDCR      | NG VENVSNV    | 490        |     |
| gi 403280150 ref XP_003931594.1           | ERDGA I KFM    | LPTDN       | ALAEKTS HV    | 488        |     |
| gi 65836963 ref XP_008259713.1            | EKDDG VRFT     | LPVDC       | ALAQKTS HV    | 456        |     |
| gi 674056440 ref XP_008839619.1           | EKDDGVRKFM     | LPADH       | VQGEKTS HV    | 488        |     |
| gi 694643962 ref XP_009479681.1           | EKGRYVKFV      | LPSATG      | E YSSGETS SNV | 488        |     |
| gi 676823415 gb KFP17617.1                | EKGRYVKFV      | LPSATG      | E YLSRETSS NV | 459        |     |
| gi 512947279 ref XP_004836120.1           | EKDDGVRKFM     | LPADS       | ILAEKTS HV    | 520        |     |
| gi 562884237 ref XP_006169609.1           | EKDDGVRKFM     | LPVDH       | VLAEKTS HV    | 526        |     |
| gi 533168218 ref XP_005397737.1           | EKDDGVRKFM     | LPTDS       | VLTEKTS HV    | 520        |     |
| gi 511879767 ref XP_004759809.1           | EKDDGVRKFM     | LPVDH       | TLAQKTS HV    | 522        |     |
| gi 677163112 gb KFP44655.1                | EKGRYVKFV      | LPSATG      | E YSSGETS SNV | 434        |     |
| gi 326921734 ref XP_003207111.1           | EGS QF KVQCS   | TANMTS WAHR | RA VSHSL      | 504        |     |
| gi 593713838 ref XP_007103422.1           | EKDDGVRKFM     | LPVDH       | ALAQKTS HV    | 635        |     |
| gi 586476470 ref XP_006868786.1           | EETDS I QFL    | LPADH       | ALAEKTS HV    | 488        |     |
| gi 677375060 gb KFO00083.1                | EKGRYVKFV      | LPSATG      | E YSSGETS SNV | 459        |     |
| gi 667335164 ref XP_008592848.1           | EKDDGVRKFM     | LPADH       | TLVEKTS LV    | 555        |     |
| gi 586532353 ref XP_006921073.1           | EKDS AVKFT     | LPMDH       | ALAEKTS HV    | 484        |     |
| gi 560930861 ref XP_006191567.1           | EKDDGVRKFM     | LPVDR       | ALAEKTS HV    | 512        |     |
| gi 472370587 ref XP_004404804.1           | EKDDGVRKFM     | LPMDH       | ALAEKTS HV    | 522        |     |
| gi 431894760 gb ELK04553.1                | EKDS AVKFT     | LPMDH       | ALAEKTS HV    | 518        |     |
| gi 676711062 gb KFO66351.1                | EKGRYVKFV      | LPSATG      | E YASGETS SNV | 459        |     |
| gi 675664592 ref XP_008997264.1           | ERDGA I KFT    | LPTDN       | SLAEKTS HV    | 498        |     |
| gi 126326172 ref XP_001368064.1           | EKETT VKFL     | LPADY       | PHTKTS HV     | 488        |     |
| gi 410968534 ref XP_003990757.1           | EKDDGVRKFM     | LPMDH       | ALAEKTS HV    | 488        |     |
| gi 410966137 ref XP_003966548.1           | EKTRHI RFTL    | PEVVSH      | V             | 483        |     |
| gi 676275422 gb KFO29854.1                | EKDDGVRKFM     | LPTDS       | ILAEKTS HV    | 613        |     |
| gi 657561192 ref XP_008284251.1           | EKS RHI RFI L  | PPDDCR      | NG LEDVSNV    | 491        |     |
| gi 640809324 ref XP_008061223.1           | ERDGA VRFT     | QPTDH       | ALVEKTS HV    | 488        |     |
| gi 557017631 ref XP_006009219.1           | EQS QFLEE I T  |             | GA VLQLS      | PERVTVM    | 489 |
| gi 554563703 ref XP_005876175.1           | EKDDG VRFT     | LPVDC       | ALAQKTS HV    | 449        |     |
| gi 505800938 ref XP_004608216.1 PREDICTED | EKDDGVRKFM     | VPNMN       | TLAEKTS HV    | 488        |     |
| gi 344289984 ref XP_003416720.1           | EKAGATRF P     | LCEDH       | TVAQKTS HV    | 488        |     |
| gi 395519413 ref XP_003763844.1           | EKKT TVKFL     | LPTDY       | PHTKTS HV     | 485        |     |
| gi 187607545 ref NP_001120430.1           | EKS PTGK P SE  | N           | G DVPLQ K     | CKL        | 473 |
| gi 471416430 ref XP_004389738.1           | EKAGAAQFP      | LPEDH       | SFAQKTS HV    | 488        |     |
| gi 1301764381 ref XP_002917160.1          | EKDDGVRKFM     | LPTDH       | ALAEKTS HV    | 488        |     |
| gi 677437107 gb KFO35295.1                | EKGRYVKFV      | LPSATG      | E YSSGETS SNV | 456        |     |
| gi 177773087 gb ACB73281.1                | QQATAPS QEP    | G           | GR TKSS S     | PRQI P VV  | 492 |
| gi 657793049 ref XP_008323412.1           | ETS QHVRFMS    | LEEEDDCR    | GG LEDVSNV    | 493        |     |
| gi 432964301 ref XP_004086917.1           | DRS LHGC       | RRLEP V     | GS AANVS      | PERVTI M   | 515 |
| gi 532060180 ref XP_005315977.1           | EKDDG VRFT     | LPTDH       | ILVEKTS HV    | 487        |     |
| gi 507927026 ref XP_004674772.1           | EKDS TVRFT     | LPTNP       | ALAEKTS HV    | 488        |     |
| gi 507551826 ref XP_004659712.1           | EKDRAVKFM      | PPTDQ       | VLVEKTS HV    | 541        |     |
| gi 395839610 ref XP_003792679.1           | ERDGA VRFT     | LP LGH      | MLAEKTS CV    | 488        |     |
| gi 573896941 ref XP_006636209.1           | ERRS VKVPNI    | T D         | S KNRRKTL I   | 474        |     |
| gi 62751817 ref NP_001015852.1            | ERN S KS       |             |               | 458        |     |
| gi 585679639 ref XP_006891515.1           | ERNPKI S SA    | L N         | G KTDI        | 469        |     |
| gi 634822528 ref XP_007935951.1           | EKADSI QFI     | LPEDH       | TLAQKTS CV    | 484        |     |
| gi 1642077565 emb CDQ86899.1              | EKS RAI RFTL   | PEDER NG    | PS QEDI SNV   | 506        |     |
| gi 632986455 ref XP_007910248.1           | ERN S KSE TE   | A L         | T NS APVI     | 467        |     |
| gi 148230759 ref NP_001083586.1           | EKS S S AGKE P | E N         | G DVPLQ T K M | 474        |     |
| gi 657582034 ref XP_008295059.1           | EST QYWP VNN   | QE PGGG RE  | AH PQQNFD D   | V          | 492 |
| gi 530577035 ref XP_005282478.1           | ERN S KDS KQS  | YND         | S KSAV        | 472        |     |
| gi 674094847 ref XP_008820731.1           | ERN S KCS KSA  | L N         | G KSDL        | 470        |     |
| gi 148223547 ref NP_001083283.1           | ERN S KH       |             |               | 458        |     |
| gi 658835831 ref XP_008426519.1           | ERNRHI RFML    | PAEDCC      | NG VEDVSNV    | 486        |     |
| gi 76691767 ref XP_583351.2               | ERNPKYESS      | L N         | G KTDI        | 470        |     |
| gi 594062502 ref XP_006055307.1           | ERNPKYESS      | L N         | G KTDI        | 470        |     |
| gi 634845398 ref XP_007938027.1           | ERN S KTS SA   | L N         | G KADI        | 469        |     |
| gi 507645744 ref XP_004702703.1           | ERS S KS A SA  | L N         | R KTDI        | 469        |     |
| gi 555978956 ref XP_005901413.1           | ERNPKYESS      | L N         | G KTDI        | 470        |     |
| gi 488585569 ref XP_004478137.1           | ERN S KMS KSA  | L N         | G KTDI        | 470        |     |
| gi 511830077 ref XP_004739737.1           | ERTS KPTS NG   | Q Y         | L KQNS        | I CMDS Q L | 477 |
| gi 291394853 ref XP_002713875.1           | ERN TDFS KSA   | V N         | G KSDI        | 470        |     |
| gi 395818569 ref XP_003782697.1           | ERN S KI S KSA | L N         | G KTDI        | 470        |     |
| gi 664746520 ref XP_008530613.1           | ERN S KFS KLA  | L N         | V KTHI        | 470        |     |
| gi 641692785 ref XP_008147562.1           | ERN S KFS KSA  | L N         | G QTDI        | 470        |     |
| gi 149705913 ref XP_001492269.1           | ERN S KFS KLA  | L N         | V KTHI        | 470        |     |
| gi 562886193 ref XP_006170537.1           | ERN S KHS KSA  | L N         | A KSDI        | 470        |     |
| gi 410952214 ref XP_003982778.1           | ERN AKP TLNG   | E R         | Y LKQSS VHV   | L DSE L    | 478 |
| gi 548463578 ref XP_005679356.1           | ERNPKYESS A    | L N         | G KTDI        | 470        |     |

Panel 9.E

|                                  |                 |                 |                                           |     |
|----------------------------------|-----------------|-----------------|-------------------------------------------|-----|
| gi 426227818 ref XP_004008012.1  | ERNPKYSESA      | L - N - - - -   | - G - KTDI - - - - -                      | 470 |
| gi 556762761 ref XP_005976673.1  | ERNPKYSESA      | L - N - - - -   | - G - KTDI - - - - -                      | 470 |
| gi 478514250 ref XP_004431376.1  | ERNSSKSKSA      | L - N - - - -   | - G - KTDI - - - - -                      | 470 |
| gi 504139789 ref XP_004582343.1  | ERDTAVVKPA      | V - N - - - -   | - G - KPDM - - - - -                      | 470 |
| gi 591384664 ref XP_007066785.1  | ERNSSKSKSA      | NYND - - - -    | - S - KSAV - - - - -                      | 472 |
| gi 431839048 gb ELK00976.1       | ERHSSKSNWH      | - - - - -       | - - - - -                                 | 462 |
| gi 591299567 ref XP_007076799.1  | ERNAKPTLNG      | E - R - - - -   | - Y - LKQSSVH - - - - - LDSE L - - - -    | 478 |
| gi 164210771 emb CDQ76188.1      | ESPCHHPPQT      | QE - - DTANG -  | - VL - PRDLSGD VTI FTCKN - - - -          | 549 |
| gi 558213257 ref XP_006134172.1  | ERNSSKSEQS      | HYND - - - -    | - S - KSAV - - - - -                      | 472 |
| gi 586554628 ref XP_006925771.1  | ERHSSKXKLKA     | L - N - - - -   | - R - KTDI - - - - -                      | 469 |
| gi 617463244 ref XP_007572760.1  | ERTQPKEMD -     | E - I - - - -   | - K - TTNL - - - - -                      | 481 |
| gi 585154586 ref XP_006729650.1  | ERNSSKQTSKG     | Q - Y - - - -   | - L - KQSS - - - - - I YLDSQ L - - - -    | 477 |
| gi 593730883 ref XP_007111076.1  | ERNPKYSESA      | L - N - - - -   | - G - KTDI - - - - -                      | 469 |
| gi 560979331 ref XP_006211922.1  | ERNPKYSDSA      | L - N - - - -   | - G - KTDI - - - - -                      | 470 |
| gi 560925797 ref XP_006189080.1  | ERNPKYSDSA      | L - N - - - -   | - G - KTDI - - - - -                      | 470 |
| gi 617642095 ref XP_007531980.1  | ERD - - - - -   | - - - - -       | - - - - -                                 | 454 |
| gi 281347098 gb EFB22682.1       | ERNSSK - - - -  | - - - - -       | - - - - -                                 | 458 |
| gi 472383394 ref XP_004411076.1  | ERNSSKPTSNG     | Q - Y - - - -   | - L - KQSS - - - - - I YLDSQ L - - - -    | 477 |
| gi 301756344 ref XP_002914022.1  | ERNSSKFVQES     | L - G - - - -   | - A - ETTGNKQ VTNQRHLQAT LGVALKKD - - - - | 491 |
| gi 326921724 ref XP_003207106.1  | ERNPQYSEQS      | NYI I - - - -   | - N - KSAV - - - - -                      | 472 |
| gi 602704474 ref XP_007446805.1  | ERNPKYSESA      | L - N - - - -   | - G - KTDI - - - - -                      | 469 |
| gi 532110716 ref XP_005340062.1  | ERDSSKSESA      | L - N - - - -   | - G - KSDI - - - - -                      | 470 |
| gi 670986751 ref XP_008684432.1  | ERNSSKPTSNG     | Q - Y - - - -   | - L - K - - - - QS SI HLDSQ L - - - -     | 476 |
| gi 544421694 ref XP_005550352.1  | ERNSSKH - - - - | - - - - -       | - - - - -                                 | 459 |
| gi 471395586 ref XP_004381559.1  | ERNSSKISSA      | L - N - - - -   | - G - KTDI - - - - -                      | 468 |
| gi 332206641 ref XP_003252407.1  | ERNSSKH - - - - | - - - - -       | - - - - -                                 | 459 |
| gi 635115010 ref XP_007980452.1  | ERNSSKH - - - - | - - - - -       | - - - - -                                 | 459 |
| gi 109067578 ref XP_001104041.1  | ERNSSKH - - - - | - - - - -       | - - - - -                                 | 459 |
| gi 483515133 gb E0B02513.1       | ERNPQY - - - -  | - - - - -       | - - - - -                                 | 459 |
| gi 402864294 ref XP_003896407.1  | ERNSSKH - - - - | - - - - -       | - - - - -                                 | 459 |
| gi 679009785 gb KFW08962.1       | YRNPQYSE - -    | - - - - -       | - - - - -                                 | 461 |
| gi 657790068 ref XP_008321837.1  | ERTDPEDASK      | Q - A - - - -   | - L - LM - - - - -                        | 472 |
| gi 344270753 ref XP_003407207.1  | ERNSSKISSA      | L - N - - - -   | - G - KTDI - - - - -                      | 468 |
| gi 465984774 ref XP_004265679.1  | ERNPKYSESA      | L - N - - - -   | - G - KSDI - - - - -                      | 469 |
| gi 100815815 ref INP_078912.2    | ERNSSKH - - - - | - - - - -       | - - - - -                                 | 459 |
| gi 426356807 ref XP_004045745.1  | ERNSSKH - - - - | - - - - -       | - - - - -                                 | 459 |
| gi 55628944 ref XP_527809.1      | ERNSSKH - - - - | - - - - -       | - - - - -                                 | 459 |
| gi 296209755 ref XP_002751668.1  | ERNSSKH - - - - | - - - - -       | - - - - -                                 | 459 |
| gi 297681122 ref XP_002818315.1  | ERNSSKH - - - - | - - - - -       | - - - - -                                 | 459 |
| gi 403257216 ref XP_003921225.1  | ERNSSKH - - - - | - - - - -       | - - - - -                                 | 459 |
| gi 564244487 ref XP_006261377.1  | ERNPQEFKNS      | NYNS - - - -    | - A - V - - - -                           | 469 |
| gi 586450897 ref XP_006834379.1  | ERNSSKMS - SV   | L - N - - - -   | - G - KTDI - - - - -                      | 469 |
| gi 557260663 ref XP_006015971.1  | ERNPQEFKNS      | NYNG - - - -    | - S - NSAV - - - - -                      | 472 |
| gi 667273517 ref XP_008571690.1  | ERSSKYSKSA      | L - N - - - -   | - G - KTYMK - - - - -                     | 484 |
| gi 507930953 ref XP_004676720.1  | ERDSSKSKSA      | L - N - - - -   | - G - KTDI - - - - -                      | 470 |
| gi 514739105 ref XP_005017950.1  | ERNPQYSEQS      | HYI I - - - -   | - N - KSAV - - - - -                      | 524 |
| gi 677057004 gb KFP23881.1       | ERNPQYSE - -    | - - - - -       | - - - - -                                 | 461 |
| gi 470640506 ref XP_004325219.1  | ERNPKYSESA      | L - N - - - -   | - G - KTDI - - - - -                      | 469 |
| gi 678145287 gb KFV14453.1       | ERNPQYSE - -    | - - - - -       | - - - - -                                 | 461 |
| gi 657789586 ref XP_008321572.1  | ERNQSKETVG      | D - N - - - -   | - K - ATNL - - - - -                      | 473 |
| gi 640815258 ref XP_008064391.1  | ERNSSKYSTLN     | - - - - -       | - K - KSDV - - - - -                      | 468 |
| gi 543727826 ref XP_005505005.1  | ERNPQYDPS       | NYI I - - - -   | - N - KSAV - - - - -                      | 524 |
| gi 594636285 ref XP_007171542.1  | ERNPKYSESA      | L - N - - - -   | - G - KTDI - - - - -                      | 469 |
| gi 262063564 ref INP_001159961.1 | ERNPKFLESA      | L - N - - - -   | - G - KTDL - - - - -                      | 470 |
| gi 584041383 ref XP_006779243.1  | ERNSSKSKSA      | L - N - - - -   | - G - QTDI - - - - -                      | 470 |
| gi 677482698 gb KFP72103.1       | ERNPQYSE - -    | - - - - -       | - - - - -                                 | 461 |
| gi 126341543 ref XP_001377787.1  | ERNSSKVS KA     | QLEN - - - -    | - G - KSEV - - - - -                      | 474 |
| gi 597799143 ref XP_007261108.1  | ERI RKCPVPQ     | HH - - HAGDNG   | - TL - PEV - - - - -                      | 502 |
| gi 507557180 ref XP_004662336.1  | ERNPRNSKST      | L - H - - - -   | - G - KSDI - - - - -                      | 469 |
| gi 597748725 ref XP_007236319.1  | ERPAKGGTAG      | K - D - - - -   | - A - KSSRPLI L - - - -                   | 472 |
| gi 676772623 gb KFP01080.1       | ERNPQYSE - -    | - - - - -       | - - - - -                                 | 461 |
| gi 658895934 ref XP_008430820.1  | ERAQPKQMD -     | E - I - - - -   | - K - TTNL - - - - -                      | 470 |
| gi 663261998 ref XP_008492349.1  | ERNPQYSEQS      | NYI I - - - -   | - N - KSAV - - - - -                      | 472 |
| gi 678214307 gb KFV81286.1       | ERNPRHSE - -    | - - - - -       | - - - - -                                 | 461 |
| gi 675309853 gb KFM05115.1       | ERNPQYSE - -    | - - - - -       | - - - - -                                 | 461 |
| gi 62955445 ref INP_001017734.1  | ERQSKTSANC      | I - - D - - - - | - G - KTNQPLM A - - - -                   | 464 |
| gi 602643791 ref XP_007428353.1  | ERKPKYI NHS     | NSNQ - - - -    | - S - TKEMSSV - - - -                     | 522 |
| gi 676720236 gb KFO89856.1       | ERNPQYSE - -    | - - - - -       | - - - - -                                 | 461 |
| gi 679216243 gb KFN94833.1       | ERKPKYSE - -    | - - - - -       | - - - - -                                 | 461 |
| gi 695163616 ref XP_009510156.1  | ERKPKYSEEP      | NYI V - - - -   | - N - KTAV - - - - -                      | 472 |
| gi 521032115 gb EPQ13901.1       | ERNSSKCSKA      | V - N - - - -   | - G - QTDI - - - - -                      | 470 |
| gi 554563717 ref XP_005876182.1  | ERNSSKCSKA      | V - N - - - -   | - G - QTDI XSN VQCTQSSSELY VSR - - - -    | 486 |
| gi 685595796 ref XP_009273959.1  | ERNPQYSEQS      | NYI I - - - -   | - N - KSAV - - - - -                      | 524 |
| gi 558171384 ref XP_006099145.1  | ERNNAKCSKA      | L - N - - - -   | - G - QTDI XSN VQCI QSSSELY V - - - -     | 484 |
| gi 677536450 gb KFO98359.1       | ERKPKYSE - -    | - - - - -       | - - - - -                                 | 461 |
| gi 679144657 gb KFW71729.1       | ERNPQYSE - -    | - - - - -       | - - - - -                                 | 461 |
| gi 677222689 gb KFP50613.1       | ERNPQHSE - -    | - - - - -       | - - - - -                                 | 461 |
| gi 694847617 ref XP_009464898.1  | ERKPKYSEQS      | NYI I - - - -   | - N - KSAV - - - - -                      | 524 |
| gi 677302700 gb KFP85128.1       | ERNPQYSE - -    | - - - - -       | - - - - -                                 | 461 |
| gi 678192031 gb KFW59725.1       | ERNPQYSE - -    | - - - - -       | - - - - -                                 | 461 |
| gi 677380957 gb KFO3816.1        | ERNPQYSE - -    | - - - - -       | - - - - -                                 | 461 |
| gi 690459533 ref XP_009328808.1  | ERNPQYSEQS      | NYI I - - - -   | - N - KSAV - - - - -                      | 524 |
| gi 292617388 ref XP_002663339.1  | ESKRNCPLVQ      | HH - - HLQANG   | - VP - - - - -                            | 481 |
| gi 527270063 ref XP_005153001.1  | ERNPQYSEQS      | HYI I - - - -   | - N - KSAV - - - - -                      | 523 |
| gi 410905459 ref XP_003966209.1  | ERNAGDSDSR      | K - A - - - -   | - L - LT - - - - -                        | 479 |
| gi 678117091 gb KFO92567.1       | ERNPPYSE - -    | - - - - -       | - - - - -                                 | 461 |
| gi 678173365 gb KFW41361.1       | ERNPQYSE - -    | - - - - -       | - - - - -                                 | 461 |
| gi 432908525 ref XP_004077904.1  | ERTDPEEST       | K - S - - - -   | - L - LR - - - - -                        | 472 |
| gi 529418079 ref XP_005228920.1  | ERNPQYSEQS      | NYI I - - - -   | - N - KSAV - - - - -                      | 472 |
| gi 677399646 gb KFO14863.1       | ERNPQYSE - -    | - - - - -       | - - - - -                                 | 461 |
| gi 541950816 ref XP_005432195.1  | ERNPQYSEQS      | NYI I - - - -   | - N - KSAV - - - - -                      | 472 |
| gi 678144582 gb KFW13748.1       | ERNPQYSE - -    | - - - - -       | - - - - -                                 | 461 |
| gi 112984288 ref XP_001037730.1  | ERKSKYAQST      | L - N - - - -   | - G - KSDI - - - - -                      | 470 |
| gi 532030822 ref XP_005358353.1  | ERNSSKSKSA      | L - N - - - -   | - G - KPDI - - - - -                      | 470 |
| gi 677769649 ref XP_009082926.1  | ERNPKYSEQS      | NYI I - - - -   | - N - KSAV - - - - -                      | 468 |
| gi 676251117 gb KFO14989.1       | ERNPQYSE - -    | - - - - -       | - - - - -                                 | 461 |
| gi 543253204 ref XP_005418648.1  | ERNPKYTKQS      | NYI I - - - -   | - N - KSAV - - - - -                      | 472 |
| gi 677147066 gb KFP40888.1       | ERKPKYK - - -   | - - - - -       | - - - - -                                 | 461 |
| gi 642120318 emb CDQ64940.1      | ERGADQRN - P    | K - D - - - -   | - S - QPLIP - - - -                       | 481 |
| gi 677553655 gb KFR13417.1       | ERNPQHS - - -   | - - - - -       | - - - - -                                 | 460 |
| gi 677457512 gb KFO46926.1       | ERNPQYSE - -    | - - - - -       | - - - - -                                 | 461 |
| gi 589949118 ref XP_006987217.1  | ERNSSKSKSA      | L - N - - - -   | - G - KSDI - - - - -                      | 470 |
| gi 632986449 ref XP_007910245.1  | ERKLSKGNDR      | V - - - - -     | - - - - -                                 | 460 |
| gi 677417976 gb KFO23007.1       | ERNPKYSE - -    | - - - - -       | - - - - -                                 | 461 |
| gi 677469944 gb KFO59358.1       | ERNPQYSE - -    | - - - - -       | - - - - -                                 | 461 |
| gi 31981509 ref INP_473439.2     | ERNSSKYTQSA     | L - N - - - -   | - G - KSDI - - - - -                      | 470 |
| gi 524985734 ref XP_005040826.1  | ERKPRYSEQS      | NYI I - - - -   | - N - KSAV - - - - -                      | 472 |
| gi 47225470 emb CAG11953.1       | ERN - - - - -   | - - - - -       | - - - - -                                 | 463 |
| gi 657537742 ref XP_008275282.1  | DRTDKAEDSE      | K - S - - - -   | - L - LT - - - - -                        | 470 |
| gi 677274891 gb KFP66209.1       | ERNPQYSE - -    | - - - - -       | - - - - -                                 | 461 |
| gi 679184773 gb KFW6184.1        | ERNPKSE - - -   | - - - - -       | - - - - -                                 | 461 |
| gi 694637176 ref XP_009477232.1  | ERNPQYSEQS      | NYI I - - - -   | - N - KSAV - - - - -                      | 524 |
| gi 345307590 ref XP_001509103.2  | ERNSSKAKKA      | QYEN - - - -    | - G - RADM - - - - -                      | 469 |
| gi 675407224 ref XP_008932024.1  | ERNPKSEQS       | NYI I - - - -   | - N - KSAV - - - - -                      | 472 |
| gi 658895943 ref XP_008430825.1  | ERTDPENDSK      | K - K - - - -   | - S - LLA - - - - -                       | 473 |

Panel 9.F

|                                 |             |        |      |               |             |      |     |
|---------------------------------|-------------|--------|------|---------------|-------------|------|-----|
| gi 678203614 gb KFV70595.1      | ERNPRYSE--  | ----   | ---- | ----          | ----        | ---- | 459 |
| gi 449492447 ref XP_002193727.2 | ERNPKYSEQS  | NYI I  | ---- | -N- KSAV-     | ----        | ---- | 465 |
| gi 677488410 gb KFQ77815.1      | ERNPQYSE--  | ----   | ---- | ----          | ----        | ---- | 461 |
| gi 551506445 ref XP_005804755.1 | ERTDTENDSK  | K - S  | ---- | -L- LA-       | ----        | ---- | 472 |
| gi 676412338 gb KFO56232.1      | ERNPKHSE--  | ----   | ---- | ----          | ----        | ---- | 461 |
| gi 291190416 ref NP_001167369.1 | LPPNHRLPCF  | W - D  | ---- | -Q- KP TI TFH | ----        | ---- | 483 |
| gi 669272195 ref XP_008628113.1 | ERNPKHSEQS  | NYI I  | ---- | -N- KSAV-     | ----        | ---- | 472 |
| gi 543346256 ref XP_005518838.1 | ERKPKYSEQS  | NYVI   | ---- | -N- KSAV-     | ----        | ---- | 472 |
| gi 542142451 ref XP_005480330.1 | ERNPKYSKQS  | NYVI   | ---- | -N- KSAV-     | ----        | ---- | 472 |
| gi 327274760 ref XP_003222144.1 | ERKS KYVNI  | NNDE   | ---- | -T- MKES SAV  | ----        | ---- | 474 |
| gi 513168239 ref XP_001235257.3 | ERNPQYSEQS  | NYVI   | ---- | -N- KSAV-     | ----        | ---- | 472 |
| gi 565316654 gb ETE68273.1      | ERKPKNMSHS  | NSNQ   | ---- | -N- TKEMS SV  | ----        | ---- | 477 |
| gi 683467094 gb KFZ61303.1      | ERNPKYSK-   | ----   | ---- | ----          | ----        | ---- | 461 |
| gi 683900635 ref XP_009084178.1 | ERNPKYAKQT  | NYI I  | ---- | -N- KSAV-     | ----        | ---- | 472 |
| gi 505775871 ref XP_004602336.1 | DRNSES SKPS | L - N  | ---- | -R- KTKI-     | ----        | ---- | 469 |
| gi 676275116 gb KFO29573.1      | ERNS KYSKSA | L - F  | ---- | -R- KSDVSSK   | AECTWAS EL- | ---- | 508 |
| gi 696975795 ref XP_009557372.1 | ERNPQYSEQS  | NYI T  | ---- | -N- KSAV-     | ----        | ---- | 472 |
| gi 676586017 gb KFO74821.1      | ERNPQYSE--  | ----   | ---- | ----          | ----        | ---- | 461 |
| gi 679006701 gb KFW07166.1      | ERNPQYSE--  | ----   | ---- | ----          | ----        | ---- | 461 |
| gi 676813260 gb KFP09648.1      | ERKPKYSE--  | ----   | ---- | ----          | ----        | ---- | 461 |
| gi 697032879 ref XP_009578615.1 | ERNPQYSEQS  | NYI I  | ---- | -N- KSAV-     | ----        | ---- | 524 |
| gi 354488334 ref XP_003506325.1 | ERDS QYSKSA | L - N  | ---- | -G- KSDI-     | ----        | ---- | 470 |
| gi 507713563 ref XP_004647823.1 | ERNS KYSKSL | S - F  | ---- | -G- KSNVSSN   | VECTWAS EI- | ---- | 482 |
| gi 524968279 ref XP_005084025.1 | ERS SQHSKSA | M - N  | ---- | -G- KSDI-     | ----        | ---- | 470 |
| gi 410905463 ref XP_003966211.1 | ERNPPLIEVN  | K - A  | ---- | -S- SL-       | ----        | ---- | 448 |
| gi 548400752 ref XP_005738595.1 | ERNRLKDEMG  | E - L  | ---- | -K- ATNM-     | ----        | ---- | 471 |
| gi 498938966 ref XP_004541746.1 | ERNRLKDEMG  | E - L  | ---- | -K- ATNM-     | ----        | ---- | 471 |
| gi 675614756 ref XP_008936236.1 | ERNPKYSEQS  | NYI I  | ---- | -N- KSAV-     | ----        | ---- | 472 |
| gi 348578509 ref XP_003475025.1 | EKNS KSKPL  | L - F  | ---- | -R- KSDVSNK   | AECTWAS EI- | ---- | 482 |
| gi 548400757 ref XP_005738596.1 | ERTDPEQERK  | K - L  | ---- | -L- LT-       | ----        | ---- | 472 |
| gi 554854825 ref XP_005937599.1 | ERTDPEQERK  | K - L  | ---- | -L- LT-       | ----        | ---- | 472 |
| gi 584013191 ref XP_006801411.1 | ERTDPEQERK  | K - L  | ---- | -L- LT-       | ----        | ---- | 472 |
| gi 498937702 ref XP_004541468.1 | ERTDPEQERK  | K - L  | ---- | -L- LT-       | ----        | ---- | 472 |
| gi 664765458 ref XP_008540415.1 | EKDGAI KFT- | LPMDH- | ---- | -TLAQKTS HV   | ----        | ---- | 524 |
